# Supplementary material for: Near Chromosome-Level Genome Assembly and Annotation of Rhodotorula babjevae Strains Reveals High Intraspecific Divergence
Source: MDPI journal article supplement (doi:10.3390/jof8040323), 2022-03-22
Supplement: s1 [file s1]

## Supplementary information

Near chromosome-level genome assembly and annotation of *Rhodotorula babjevae* strains reveals high intraspecific divergence

Giselle C. Martín-Hernández<sup>1</sup>, Bettina Müller<sup>1</sup>, Christian Brandt<sup>2</sup>, Martin Hölzer<sup>3</sup>, Adrian Viehweger<sup>4</sup>, Volkmar Passoth<sup>1,\*</sup>

<sup>1</sup>Department of Molecular Sciences, Swedish University of Agricultural Sciences, 75007 Uppsala, Sweden

<sup>2</sup>Institute for Infectious Diseases and Infection Control, Jena University Hospital, Jena, Germany

<sup>3</sup>Method Development and Research Infrastructure, MF1 Bioinformatics, Robert Koch Institute, Berlin, Germany

<sup>4</sup>Institute of Medical Microbiology and Virology, University Hospital Leipzig, Germany

\* Author for Correspondence: Volkmar Passoth, Department of Molecular Sciences, Swedish University of Agricultural Sciences, Uppsala, Sweden, +4618673380, [Volkmar.Passoth@slu.se](mailto:Volkmar.Passoth@slu.se)

G.C.M.-H. and B.M. equally contributed to this paper and shall both be regarded as first authors

**Supplementary Table S1.** Program versions used for the genome assembly and annotation pipeline

**Supplementary Table S2.** Characteristics from the contigs and scaffolds of *Rhodotorula babjevae* CBS 7808 genome assembly

**Supplementary Table S3.** Characteristics from the contigs and scaffolds of *Rhodotorula babjevae* DBVPG 8058 genome assembly

**Supplementary Table S4.** Distribution of exon counts in the two strains of *Rhodotorula babjevae*.

**Supplementary Table S5.** Examples of lipid and carotenoid metabolism related genes in *Rhodotorula babjevae* CBS 7808

**Supplementary Table S6.** Examples of lipid and carotenoid metabolism related genes in *Rhodotorula babjevae* DBVPG 8058

**Supplementary Table S7.** Scaffold and contigs with assigned homology and pairwise nucleotide identity between *Rhodotorula babjevae* strains

**Supplementary Table S8.** Summary of features of strain-unique contigs in *Rhodotorula babjevae*

**Supplementary Table S9.** Genetic divergence between *Rhodotorula babjevae* strains and closely related *Rhodotorula* species

**Supplementary Table S10.** Alignment statistics of the duplicated genes identified in the *Rhodotorula babjevae* CBS 7808 genome by OrthoVenn2

**Supplementary Table S11.** Alignment statistics of the duplicated genes identified in the *Rhodotorula babjevae* DBVPG 8058 genome by OrthoVenn2

**Supplementary Table S12.** Alignment statistics of the duplicated genes identified in the *Rhodotorula babjevae* CBS 7808 genome by BLASTp

**Supplementary Table S13.** Alignment statistics of the duplicated genes identified in the *Rhodotorula babjevae* DBVPG 8058 genome by BLASTp

**Supplementary Table S14.** Duplicated genes in *Rhodotorula babjevae* identified by BLASTp and OrthoVenn2 with a minimum coverage of 70%

**Supplementary Figure S1.** Gene Ontology (GO) term summary related to the GO topic: molecular functions

**Supplementary Figure S2.** Gene Ontology (GO) term summaries belonging to the GO topic: biological processes

**Supplementary Figure S3.** Gene Ontology (GO) term summaries belonging to the GO topic: cellular components

**Supplementary Figure S4.** Examples of lipid metabolism pathways in *Rhodotorula babjevae* CBS 7808 reconstructed by KEGG Mapper

**Supplementary Figure S5.** Examples of lipid metabolism pathways in *Rhodotorula babjevae* DBVPG 8058 reconstructed by KEGG Mapper

**Supplementary Figure S6.** Quantitative assessment of the hybrid genome assemblies and annotation completeness using Benchmarking Universal Single-Copy Orthologs (BUSCO)

**Supplementary Figure S7.** LASTZ alignment of the mitochondrial genome sequences of *Rhodotorula babjevae* CBS 7808 and DBVPG 8058

**Supplementary Figure S8.** LASTZ alignment of contigs with assigned homology of *Rhodotorula babjevae* CBS 7808 and DBVPG 8058 representing putative chromosomes

**Supplementary Table S1.** Program versions used for the genome assembly and annotation pipeline

| Program            | Version   |
|--------------------|-----------|
| Bandage            | 0.8.1     |
| BBMap              | 38.86     |
| Biopython          | 1.74      |
| BioRuby            | 2.0.1     |
| BUSCO              | 3.0.2     |
| BWA                | 0.7.17    |
| chromoMap          | 0.2       |
| dammit             | 1.2       |
| fastp              | 0.20.0    |
| FastQC             | 0.11.8    |
| Filtlong           | 0.2.0     |
| Flye               | 2.8       |
| ggplot2            | 3.3.1     |
| HISAT              | 2.2.0     |
| Medaka             | 0.10.0    |
| MetaEuk            | 1.ea903e5 |
| minimap2           | 2.17      |
| MITOS              | 2.0.3     |
| MultiQC            | 1.8       |
| NanoPlot           | 1.25.0    |
| Pilon              | 1.23      |
| Racon              | 1.4.7     |
| RepeatMasker       | 4.0.9     |
| samtools           | 1.10      |
| simple-circularise | 1.0       |
| SortMeRNA          | 2.1b      |
| sourmash           | 2.0.1     |
| StringTie          | 2.1.1     |
| Tapestry           | 1.0.0     |

**Supplementary Table S2.** Characteristics from the contigs and scaffolds of *Rhodotorula**babjevae* CBS 7808 genome assembly

| Contig/scaffold | Length<br>(bp) | GC content<br>(%) | Read<br>depth | No. of telomeric<br>regions |
|-----------------|----------------|-------------------|---------------|-----------------------------|
| ontig 10        | 1,067,634      | 67.97             | 39            | 0                           |
| contig 11       | 1,300,441      | 68.18             | 42            | 1                           |
| contig 12       | 511,897        | 68.45             | 33            | 0                           |
| contig 2        | 30,876         | 38.85             | 892           | 2                           |
| contig 25       | 627,118        | 68.03             | 47            | 0                           |
| contig 26       | 40,644         | 57.95             | 20            | 1                           |
| contig 27       | 320,063        | 67.64             | 31            | 1                           |
| contig 28       | 422,133        | 67.84             | 36            | 0                           |
| contig 3        | 1,574,520      | 68.39             | 49            | 1                           |
| contig 30       | 1,569,459      | 68.66             | 48            | 0                           |
| contig 31       | 979,228        | 68.28             | 40            | 1                           |
| contig 36       | 1,056,323      | 68.50             | 52            | 0                           |
| contig 37       | 362,52         | 68.05             | 34            | 0                           |
| contig 38       | 881,966        | 68.53             | 51            | 1                           |
| contig 39       | 564,129        | 68.13             | 41            | 1                           |
| contig 4        | 418,972        | 67.71             | 38            | 1                           |
| contig 45       | 762,86         | 68.32             | 37            | 1                           |
| contig 46       | 8,677          | 65.90             | 79            | 0                           |
| contig 5        | 2,415,752      | 68.54             | 46            | 1                           |
| contig 62       | 644,441        | 68.12             | 42            | 0                           |
| contig 65       | 630,535        | 68.27             | 52            | 1                           |
| contig 66       | 406,102        | 68.73             | 45            | 0                           |
| contig 7        | 1,460,653      | 68.35             | 46            | 1                           |
| contig 9        | 429,397        | 68.87             | 36            | 1                           |
| scaffold 40     | 948,604        | 68.04             | 50            | 0                           |
| scaffold 49     | 1,089,446      | 67.93             | 52            | 0                           |
| scaffold 6      | 1,337,997      | 68.23             | 46            | 1                           |

**Supplementary Table S3.** Characteristics from the contigs and scaffolds of *Rhodotorula**babjevae* DBVPG 8058 genome assembly

| Contig/scaffold | Length<br>(bp) | GC content<br>(%) | Read<br>depth | No. of telomeric<br>regions |
|-----------------|----------------|-------------------|---------------|-----------------------------|
| contig 1        | 565,532        | 67.52             | 44            | 1                           |
| contig 20       | 637,402        | 68.57             | 43            | 0                           |
| contig 33       | 529,001        | 68.19             | 42            | 2                           |
| contig 38       | 1,780,658      | 68.22             | 43            | 0                           |
| contig 40       | 1,004,683      | 68.30             | 43            | 1                           |
| contig 42       | 1,446,680      | 68.41             | 45            | 0                           |
| contig 44       | 357,974        | 68.15             | 44            | 0                           |
| contig 45       | 394,205        | 68.00             | 42            | 0                           |
| contig 46       | 670,828        | 68.68             | 42            | 1                           |
| contig 47       | 557,103        | 68.12             | 43            | 0                           |
| contig 48       | 931,129        | 68.59             | 43            | 1                           |
| contig 49       | 396,114        | 68.44             | 40            | 1                           |
| contig 51       | 924,743        | 68.52             | 45            | 1                           |
| contig 53       | 571,073        | 67.98             | 43            | 1                           |
| contig 54       | 766,724        | 68.39             | 40            | 0                           |
| contig 57       | 1,049,892      | 68.40             | 43            | 1                           |
| contig 65       | 41,334         | 67.14             | 59            | 1                           |
| contig 66       | 419,035        | 67.94             | 44            | 1                           |
| contig 68       | 408,627        | 68.12             | 39            | 0                           |
| contig 69       | 1,447,990      | 68.48             | 45            | 1                           |
| contig 70       | 789,767        | 68.03             | 43            | 0                           |
| contig 71       | 449,691        | 68.69             | 42            | 1                           |
| contig 72       | 5,97           | 48.69             | 306           | 2                           |
| contig 73       | 659,761        | 67.77             | 41            | 0                           |
| contig 74       | 614,034        | 68.46             | 41            | 0                           |
| contig 75       | 900,917        | 68.16             | 43            | 0                           |
| contig 77       | 446,828        | 68.09             | 43            | 1                           |
| contig 79       | 28,432         | 38.89             | 1160          | 1                           |
| contig 82       | 299,18         | 68.75             | 40            | 2                           |
| contig 83       | 6,381          | 59.36             | 101           | 0                           |
| contig 84       | 425,34         | 67.39             | 45            | 0                           |
| contig 85       | 573,802        | 68.36             | 41            | 1                           |
| contig 86       | 443,617        | 68.68             | 42            | 1                           |
| scaffold 52     | 977,625        | 68.29             | 43            | 1                           |

**Supplementary Table S4.** Distribution of exon counts in the two strains of *Rhodotorula babjevae*.

| Strain               | CBS 7808              | DBVPG 8058 |
|----------------------|-----------------------|------------|
| Exons per transcript | Number of transcripts |            |
| 1                    | 1201                  | 1176       |
| 2                    | 1400                  | 1417       |
| 3                    | 1367                  | 1366       |
| 4                    | 1108                  | 1154       |
| 5                    | 808                   | 767        |
| 6                    | 581                   | 539        |
| 7                    | 391                   | 385        |
| 8                    | 275                   | 268        |
| 9                    | 168                   | 159        |
| 10                   | 121                   | 95         |
| 11                   | 61                    | 68         |
| 12                   | 42                    | 54         |
| 13                   | 36                    | 29         |
| 14                   | 19                    | 17         |
| 15                   | 11                    | 8          |
| 16                   | 5                     | 5          |
| 17                   | 4                     | 3          |
| 18                   | 2                     | 2          |
| 19                   | 2                     | 1          |
| 20                   | 3                     | 1          |
| 21                   | 0                     | 1          |
| 23                   | 0                     | 1          |
| 24                   | 2                     | 0          |
| Total                | 7607                  | 7516       |

**Supplementary Table S5.** Examples of lipid and carotenoid metabolism related genes in *Rhodotorula babjevae* CBS 7808

| Gene          | Enzyme                                            | EC                  | Pathway                          | Contig/scaffold | Gene ID                                        |
|---------------|---------------------------------------------------|---------------------|----------------------------------|-----------------|------------------------------------------------|
| <i>CDC19</i>  | Pyruvate kinase 1                                 | 2.7.1.40            | Glycolysis                       | contig 10       | NANOZOOG247,<br>NANOZOOG248                    |
| <i>MAE1</i>   | NADP-dependent malic enzyme                       | 1.1.1.40            | NADPH regeneration               | contig 10       | NANOZOOG21                                     |
| <i>MAE2</i>   | NAD-dependent malic enzyme 3                      | 1.1.1.38            | Tricarboxylic acid cycle         | contig 36       | NANOZOOG2566                                   |
| <i>ACL2</i>   | ATP-citrate synthase subunit 2                    | 2.3.3.8             | Lipid synthesis                  | contig 30       | NANOZOOG1597                                   |
| <i>ACL1</i>   | ATP-citrate synthase subunit 1                    | 2.3.3.8             | Lipid synthesis                  | contig 30       | NANOZOOG1598                                   |
| <i>ACC1</i>   | Acetyl-CoA carboxylase                            | 6.4.1.2             | Fatty acid synthesis             | scaffold 6      | NANOZOOG7298,<br>NANOZOOG7299,<br>NANOZOOG7300 |
| <i>FAS1</i>   | $\beta$ - subunit of fatty acid synthase complex  | 2.3.1.86            | Fatty acid synthesis             | scaffold 6      | NANOZOOG7332,<br>NANOZOOG7509                  |
| <i>FAS2</i>   | $\alpha$ - subunit of fatty acid synthase complex | 2.3.1.86            | Fatty acid synthesis             | scaffold 6      | NANOZOOG7507,<br>NANOZOOG7508                  |
| <i>OLE1</i>   | Acyl-CoA desaturase                               | 1.14.19.1           | Unsaturated fatty acid synthesis | contig 30       | NANOZOOG1596                                   |
| <i>ACAD11</i> | Acyl-CoA dehydrogenase family member 11           | 1.3.99              | Fatty acid beta-oxidation        | scaffold 6      | NANOZOOG7232                                   |
| <i>IBR3</i>   | Probable acyl-CoA dehydrogenase IBR3              | 1.3.99              | Fatty acid beta-oxidation        | scaffold 49     | NANOZOOG6894                                   |
| <i>EC11</i>   | Enoyl-CoA hydratase 1                             | 4.2.1.17            | Fatty acid beta-oxidation        | scaffold 49     | NANOZOOG6861                                   |
| <i>EC11</i>   | Enoyl-CoA hydratase 1                             | 4.2.1.17            | Fatty acid beta-oxidation        | contig 11       | NANOZOOG791                                    |
| <i>POT1</i>   | Acetyl-CoA acyltransferase                        | 2.3.1.16            | Fatty acid beta-oxidation        | contig 3        | NANOZOOG3582,<br>NANOZOOG3634                  |
| <i>POT1</i>   | Acetyl-CoA acyltransferase                        | 2.3.1.16            | Fatty acid beta-oxidation        | contig 65       | NANOZOOG5517                                   |
| <i>POT1</i>   | Acetyl-CoA acyltransferase                        | 2.3.1.16            | Fatty acid beta-oxidation        | contig 36       | NANOZOOG2634                                   |
| <i>LRO1</i>   | Phospholipid:diacylglycerol acyltransferase       | 2.3.1.158           | Glycerolipid synthesis           | contig 5        | NANOZOOG4705                                   |
| <i>HMG1</i>   | HMG-CoA reductase                                 | 1.1.1.34            | Isoprenoid synthesis             | contig 31       | NANOZOOG2214,<br>NANOZOOG2215,<br>NANOZOOG2216 |
| <i>HCS1</i>   | HMG-CoA synthase                                  | 2.3.3.10            | Isoprenoid synthesis             | contig 62       | NANOZOOG5192                                   |
| <i>ERG8</i>   | Phosphomevalonate kinase, peroxisomal             | 2.7.4.2             | Isoprenoid synthesis             | scaffold 6      | NANOZOOG7354                                   |
| <i>crtYB</i>  | Bifunctional lycopene cyclase/phytoene synthase   | 5.5.1.19 & 2.5.1.32 | Carotenoid synthesis             | scaffold 6      | NANOZOOG7200                                   |
| <i>crtI</i>   | Phytoene desaturase                               | 1.3.99.30           | Carotenoid synthesis             | scaffold 6      | NANOZOOG7203                                   |
| <i>BTS1</i>   | Geranylgeranyl pyrophosphate synthase             | 2.5.1.-             | Carotenoid synthesis             | contig 5        | NANOZOOG4762                                   |



**Supplementary Table S6.** Examples of lipid and carotenoid metabolism related genes in *Rhodotorula babjevae* DBVPG 8058

| Gene               | Enzyme                                            | EC                     | Pathway                          | Contig/scaffold | Gene ID                                                         |
|--------------------|---------------------------------------------------|------------------------|----------------------------------|-----------------|-----------------------------------------------------------------|
| <i>CDC19</i>       | Pyruvate kinase 1                                 | 2.7.1.40               | Glycolysis                       | contig 54       | NANOZOOG3961,<br>NANOZOOG3962                                   |
| <i>MAE1</i>        | NADP-dependent malic enzyme                       | 1.1.1.40               | NADPH regeneration               | contig 47       | NANOZOOG2569                                                    |
| <i>MAE2</i>        | NAD-dependent malic enzyme 2                      | 1.1.1.38               | Tricarboxylic acid cycle         | contig 57       | NANOZOOG4100                                                    |
| <i>ACL1</i>        | ATP-citrate synthase subunit 1                    | 2.3.3.8                | Lipid synthesis                  | contig 20       | NANOZOOG209                                                     |
| <i>ACC1</i>        | Acetyl-CoA carboxylase                            | 6.4.1.2                | Fatty acid synthesis             | contig 70       | NANOZOOG5315,<br>NANOZOOG5316,<br>NANOZOOG5317,<br>NANOZOOG5318 |
| <i>FAS1</i>        | $\beta$ - subunit of fatty acid synthase complex  | 2.3.1.86               | Fatty acid synthesis             | contig 70       | NANOZOOG5349                                                    |
| <i>FAS2</i>        | $\alpha$ - subunit of fatty acid synthase complex | 2.3.1.86               | Fatty acid synthesis             | contig 33       | NANOZOOG458,<br>NANOZOOG459                                     |
| <i>OLE1</i>        | Acyl-CoA desaturase                               | 1.14.19.1              | Unsaturated fatty acid synthesis | contig 20       | NANOZOOG210                                                     |
| <i>ACAD10</i>      | Acyl-CoA dehydrogenase family member 10           | 1.3.99                 | Fatty acid beta-oxidation        | contig 53       | NANOZOOG3588                                                    |
| <i>ACAD11</i>      | Acyl-CoA dehydrogenase family member 11           | 1.3.99                 | Fatty acid beta-oxidation        | contig 70       | NANOZOOG5252                                                    |
| <i>IBR3</i>        | Probable acyl-CoA dehydrogenase IBR3              | 1.3.99                 | Fatty acid beta-oxidation        | contig 40       | NANOZOOG1380                                                    |
| <i>D6C81 05617</i> | Enoyl-CoA hydratase 1                             | 4.2.1.17               | Fatty acid beta-oxidation        | contig 40       | NANOZOOG1413                                                    |
| <i>POT1</i>        | Acetyl-CoA acyltransferase                        | 2.3.1.16               | Fatty acid beta-oxidation        | contig 57       | NANOZOOG4029                                                    |
| <i>POT1</i>        | Acetyl-CoA acyltransferase                        | 2.3.1.16               | Fatty acid beta-oxidation        | contig 74       | NANOZOOG5938                                                    |
| <i>POT1</i>        | Acetyl-CoA acyltransferase                        | 2.3.1.16               | Fatty acid beta-oxidation        | contig 75       | NANOZOOG6026,<br>NANOZOOG6080                                   |
| <i>HMG1</i>        | HMG-CoA reductase                                 | 1.1.1.34               | Isoprenoid synthesis             | contig 82       | NANOZOOG6558,<br>NANOZOOG6559,<br>NANOZOOG6560                  |
| <i>HCS1</i>        | HMG-CoA synthase                                  | 2.3.3.10               | Isoprenoid synthesis             | contig 38       | NANOZOOG1015                                                    |
| <i>crtYB</i>       | Bifunctional lycopene cyclase/phytoene synthase   | 5.5.1.19 &<br>2.5.1.32 | Carotenoid synthesis             | contig 70       | NANOZOOG5230                                                    |
| <i>crtI</i>        | Phytoene desaturase                               | 1.3.99.30              | Carotenoid synthesis             | contig 70       | NANOZOOG5227                                                    |
| <i>BTS1</i>        | Geranylgeranyl pyrophosphate synthase             | 2.5.1.-                | Carotenoid synthesis             | contig 69       | NANOZOOG5016                                                    |

**Supplementary Table S7.** Scaffold and contigs with assigned homology and pairwise nucleotide identity between *Rhodotorula babjevae* strains (deduced from LASTZ alignment, Figure S8).

| DBVPG<br>8058 | CBS 7808 |    |    |    |    |    |    |    |    |    |    |    |    |    |    |    |    |    |    |    |    |    |    |    |    |    |    |  |  |
|---------------|----------|----|----|----|----|----|----|----|----|----|----|----|----|----|----|----|----|----|----|----|----|----|----|----|----|----|----|--|--|
|               | 2        | 3  | 4  | 5  | 7  | 9  | 10 | 11 | 12 | 25 | 26 | 27 | 28 | 30 | 31 | 36 | 37 | 38 | 39 | 45 | 46 | 62 | 65 | 66 | 6  | 40 | 49 |  |  |
| 1             |          |    |    |    |    |    |    |    |    |    |    |    |    |    |    |    |    |    | 85 |    |    |    |    |    |    |    |    |  |  |
| 20            |          |    |    |    |    |    |    |    |    |    |    |    |    | 84 |    |    |    |    |    |    |    |    |    |    |    |    |    |  |  |
| 33            |          |    |    |    |    |    |    |    |    |    |    |    |    |    |    |    |    |    |    |    |    |    |    |    | 82 |    |    |  |  |
| 38            |          |    |    |    |    |    |    |    |    |    |    | 85 |    |    |    |    |    | 85 |    |    |    | 85 |    |    |    |    |    |  |  |
| 40            |          |    |    |    |    |    |    |    |    |    |    |    |    |    |    |    |    |    |    |    |    |    |    |    |    |    | 83 |  |  |
| 42            |          |    |    |    |    |    |    | 84 |    |    |    |    |    | 84 |    |    |    |    |    |    |    |    |    |    |    |    |    |  |  |
| 44            |          |    |    |    |    |    |    | 86 |    |    |    |    |    | 64 |    |    |    |    |    |    |    |    |    |    |    |    |    |  |  |
| 45            |          |    | 82 |    |    |    |    |    |    |    |    |    |    |    |    |    |    |    |    |    |    |    |    |    |    |    |    |  |  |
| 46            |          | 85 |    |    |    |    |    |    |    |    |    |    |    |    |    |    |    |    |    |    |    |    |    |    |    |    |    |  |  |
| 47            |          |    |    |    |    |    | 82 |    |    |    |    |    |    |    |    |    |    |    |    |    |    |    |    |    |    |    |    |  |  |
| 48            |          |    |    |    | 84 |    |    |    |    |    |    |    |    |    |    |    |    |    |    |    |    |    |    |    |    |    |    |  |  |
| 49            |          |    |    |    |    |    |    |    |    |    |    |    |    |    |    |    |    |    |    |    |    |    | 85 |    |    |    |    |  |  |
| 51            |          |    |    |    |    |    |    |    |    |    |    |    |    |    |    |    |    |    |    |    |    |    |    |    |    | 84 |    |  |  |
| 53            |          |    |    |    | 86 |    |    |    |    |    |    |    |    |    |    |    |    |    |    |    |    |    |    |    |    |    |    |  |  |
| 54            |          |    |    |    |    |    | 85 |    |    |    |    |    |    |    |    |    |    |    |    | 85 |    |    |    |    |    |    |    |  |  |
| 57            |          |    |    |    |    |    |    |    |    |    |    |    |    |    | 83 |    |    |    |    |    |    |    |    |    |    |    |    |  |  |
| 65            |          |    |    |    |    |    |    |    |    |    |    |    |    |    |    |    |    |    |    |    |    |    |    |    |    |    | 91 |  |  |
| 66            |          |    |    |    |    |    |    |    |    |    |    |    | 84 |    |    |    |    |    |    |    |    |    |    |    |    |    |    |  |  |
| 68            |          |    |    |    |    |    |    |    | 84 |    |    |    |    |    |    |    | 84 |    |    |    |    |    |    |    |    |    |    |  |  |
| 69            |          |    | 84 |    |    |    |    |    |    |    |    |    |    |    |    |    |    |    |    |    |    |    |    |    |    |    |    |  |  |
| 70            |          |    |    |    |    |    |    |    |    |    |    |    |    |    |    |    |    |    |    |    |    |    |    |    | 83 |    |    |  |  |
| 71            |          |    |    |    |    |    |    |    | 86 |    |    |    |    |    |    |    | 86 |    |    |    |    |    |    |    |    |    |    |  |  |
| 72            |          |    |    |    |    |    |    |    |    |    |    |    |    |    |    |    |    |    |    |    |    |    |    |    |    |    |    |  |  |
| 73            |          |    |    |    |    |    |    |    |    |    |    |    |    | 84 |    |    |    |    |    |    |    |    |    |    |    |    |    |  |  |
| 74            |          |    |    |    |    |    |    |    |    |    |    |    |    |    |    |    |    |    |    |    |    | 83 |    |    |    |    |    |  |  |
| 75            |          | 84 |    |    |    |    |    |    |    |    |    |    |    |    |    |    |    |    |    |    |    |    |    |    |    |    |    |  |  |
| 77            |          |    |    |    |    |    |    |    |    |    |    |    |    |    |    |    |    |    |    | 86 |    |    |    |    |    |    |    |  |  |
| 79            | 97       |    |    |    |    |    |    |    |    |    |    |    |    |    |    |    |    |    |    |    |    |    |    |    |    |    |    |  |  |
| 82            |          |    |    |    |    |    |    |    |    |    |    |    |    | 85 |    |    |    |    |    |    |    |    |    |    |    |    |    |  |  |
| 83            |          |    |    |    |    |    |    |    |    |    |    |    |    |    |    |    |    |    |    |    |    |    |    |    |    |    |    |  |  |
| 84            |          |    |    |    |    |    |    | 85 |    |    |    |    |    |    |    |    |    |    |    |    |    |    |    |    |    |    |    |  |  |
| 85            |          |    |    |    |    |    |    |    | 85 |    |    |    |    |    |    |    |    |    |    |    |    |    |    |    |    |    |    |  |  |
| 86            |          |    |    |    |    | 87 |    |    |    |    |    |    |    |    |    |    |    |    |    |    |    |    |    |    |    |    |    |  |  |
| 52            |          |    |    | 84 |    |    |    |    |    |    |    |    |    |    |    |    |    |    |    |    |    |    |    |    |    |    |    |  |  |

The contigs corresponding to the mitochondrial genome are denoted in yellow and to putative extrachromosomal elements in green.

**Supplementary Table S8.** Summary of features from strain-unique contigs in *Rhodotorula babjevae*

| Contig name | <i>R. babjevae</i><br>strain number | Size (bp) | GC content (%) | Relative read depth* | Size of circular<br>contig (bp) |
|-------------|-------------------------------------|-----------|----------------|----------------------|---------------------------------|
| contig 26   | CBS 7808                            | 40,644    | 57.95          | 0,5                  | 30,109                          |
| contig 46   | CBS 7808                            | 8,677     | 65.9           | 1,8                  | -                               |
| contig 83   | DBVPG 8058                          | 6,381     | 59.36          | 2,4                  | -                               |
| contig 72   | DBVPG 8058                          | 5,97      | 48.69          | 7,2                  | -                               |

\*Read depth of the contig divided by the average read depth of contigs with assigned homology between *Rhodotorula babjevae* strains

**Supplementary Table S9.** Genetic divergence between *Rhodotorula babjevae* strains and closely related *Rhodotorula* species

| <i>Rhodotorula babjevae</i> CBS 7808   |                  |              |                     |         |           |                  |
|----------------------------------------|------------------|--------------|---------------------|---------|-----------|------------------|
| Strain                                 | DNA-DNA homology |              |                     | ANI     | <i>kr</i> | Accession number |
|                                        | Distance         | DDH estimate | Difference in % G+C |         |           |                  |
| <i>R. babjevae</i> DBVPG 8058          | 0.5787           | 44.20%       | 0.00                | 84.48 % | 0.08895 9 | this study       |
| <i>R. graminis</i> WP1                 | 0.6415           | 39.00%       | 0.47                | 82.85 % | 0.09838 7 | JTAO00000000.1   |
| <i>R. glutinis</i> ZHK                 | 0.6240           | 40.40%       | 0.43                | 83.43 % | 0.09528 8 | JAAGPT00000000.1 |
| <i>R. toruloides</i> CBS 14            | 0.9350           | 22.40%       | 6.40                | 77.01 % | 0.22154 0 | PRJEB40807       |
| <i>Rhodotorula babjevae</i> DBVPG 8058 |                  |              |                     |         |           |                  |
| <i>R. babjevae</i> CBS 7808            | 0.5787           | 44.20%       | 0.00                | 84.48 % | 0.08895 9 | this study       |
| <i>R. graminis</i> WP1                 | 0.6349           | 39.50%       | 0.48                | 82.88 % | 0.09605 9 | JTAO00000000.1   |
| <i>R. glutinis</i> ZHK                 | 0.6233           | 40.40%       | 0.43                | 83.26 % | 0.09588 6 | JAAGPT00000000.1 |
| <i>R. toruloides</i> CBS 14            | 0.9319           | 22.50%       | 6.40                | 77.36 % | 0.20577 2 | PRJEB40807       |
| <i>Rhodotorula toruloides</i> CBS 14   |                  |              |                     |         |           |                  |
| <i>R. toruloides</i> NP11              | 0.0893           | 97.60%       | 0.21                | 100%    | 0.00044 5 | ALAU00000000.1   |
| <i>R. toruloides</i> CGMCC 2.1609      | 0.3725           | 66.80%       | 0.10                | 99.27 % | 0.00033 7 | LKER00000000.1   |
| <i>R. toruloides</i> VN1               | 0.6319           | 39.7%        | 0.07                | 85.48 % | 0.09406 3 | SJTE00000000.1   |
| <i>R. toruloides</i> NBRC 0880         | 0.6456           | 38.60%       | 0.00                | 85.15 % | 0.10189 8 | LCTV00000000.2   |

ANI, Average Nucleotide Identity values using the web-based calculator available at Kostas Lab [17]; DDH, DNA–DNA homology estimated using the Genome-to-Genome Distance Calculator 2.1 with GBDP2 MUMMER program [18].

**Supplementary Table S10.** Alignment statistics of the duplicated genes identified in the *Rhodotorula babjevae* CBS 7808 genome by OrthoVenn2

| Contig/<br>scaffold | Quer<br>y | Subjec<br>t | Inflatio<br>n | Quer<br>y<br>start | Quer<br>y<br>stop | Subjec<br>t<br>start | Subjec<br>t<br>stop | %<br>identit<br>y | %<br>coverag<br>e | Mismatche<br>s | Gap<br>s | Gap<br>Bases | Scor<br>e | E-<br>Value | Gene ID      | Stran<br>d |
|---------------------|-----------|-------------|---------------|--------------------|-------------------|----------------------|---------------------|-------------------|-------------------|----------------|----------|--------------|-----------|-------------|--------------|------------|
| contig 10           | 7         | 2           | 1,1           | 1                  | 218               | 5                    | 222                 | 100               | 46                | 0              | 0        | 0            | 1135      | 7E-154      | NANOZOOG8    | -          |
|                     |           |             |               | 290                | 456               | 222                  | 385                 | 95                | 34                | 6              | 1        | 3            | 783       | 1E-100      |              |            |
| contig 10           | 2         | 7           | 1,1           | 5                  | 222               | 1                    | 218                 | 100               | 55                | 0              | 0        | 0            | 1135      | 6E-154      | NANOZOOG3    | +          |
|                     |           |             |               | 222                | 385               | 290                  | 456                 | 95                | 41                | 6              | 1        | 3            | 783       | 9E-101      |              |            |
| contig 10           | 84        | 701         | 0,9           | 12                 | 359               | 1                    | 401                 | 68                | 94                | 66             | 7        | 63           | 1338      | 0E+00       | NANOZOOG85   | -          |
| contig 11           | 701       | 84          | 0,9           | 1                  | 401               | 12                   | 359                 | 68                | 84                | 66             | 7        | 63           | 1338      | 0E+00       | NANOZOOG701  | -          |
| contig 12           | 801       | 812         | 0,8           | 1                  | 280               | 1                    | 304                 | 89                | 82                | 8              | 1        | 24           | 1379      | 0E+00       | NANOZOOG801  | +          |
| contig 12           | 812       | 801         | 0,8           | 1                  | 304               | 1                    | 280                 | 89                | 91                | 8              | 1        | 24           | 1379      | 0E+00       | NANOZOOG812  | -          |
| contig 12           | 830       | 831         | 0,5           | 13                 | 178               | 1                    | 166                 | 100               | 93                | 0              | 0        | 0            | 894       | 1E-125      | NANOZOOG830  | +          |
| contig 12           | 831       | 830         | 0,5           | 1                  | 166               | 13                   | 178                 | 100               | 97                | 0              | 0        | 0            | 894       | 1E-125      | NANOZOOG831  | -          |
| contig 12           | 865       | 866         | 0,7           | 278                | 663               | 194                  | 574                 | 47                | 45                | 82             | 9        | 167          | 885       | 4E-111      | NANOZOOG865  | +          |
| contig 12           | 866       | 865         | 0,7           | 194                | 574               | 278                  | 663                 | 47                | 52                | 82             | 9        | 167          | 891       | 5E-112      | NANOZOOG866  | +          |
|                     |           |             |               | 1                  | 92                | 118                  | 236                 | 56                | 16                | 25             | 3        | 27           | 363       | 6E-37       |              |            |
| contig 27           | 1195      | 1201        | 1,8           | 1144               | 1928              | 18                   | 755                 | 91                | 38                | 24             | 4        | 47           | 3062      | 0E+00       | NANOZOOG1195 | -          |
| contig 27           | 1201      | 1195        | 1,8           | 18                 | 755               | 1144                 | 1928                | 91                | 90                | 24             | 4        | 47           | 3065      | 0E+00       | NANOZOOG1201 | +          |
| contig 10           | 122       | 123         | 0,4           | 8                  | 190               | 1                    | 211                 | 84                | 91                | 5              | 1        | 28           | 873       | 2E-121      | NANOZOOG123  | +          |
| contig 10           | 123       | 122         | 0,4           | 1                  | 211               | 8                    | 190                 | 87                | 87                | 0              | 1        | 28           | 905       | 3E-126      | NANOZOOG124  | -          |
| contig 28           | 1319      | 1324        | 0,7           | 7                  | 308               | 256                  | 553                 | 76                | 96                | 68             | 3        | 4            | 1123      | 2E-152      | NANOZOOG1319 | -          |
| contig 28           | 1324      | 1319        | 0,7           | 1                  | 245               | 62                   | 309                 | 83                | 44                | 38             | 2        | 3            | 960       | 1E-127      | NANOZOOG1324 | +          |
| contig 30           | 1409      | 1960        | 1,8           | 1                  | 789               | 26                   | 830                 | 90                | 58                | 68             | 2        | 16           | 3512      | 0E+00       | NANOZOOG1409 | -          |
| contig 30           | 1960      | 1409        | 1,8           | 26                 | 830               | 1                    | 789                 | 90                | 95                | 63             | 2        | 16           | 3419      | 0E+00       | NANOZOOG1956 | +          |
| contig 30           | 1409      | 2182        | 1,8           | 1                  | 1354              | 3                    | 1301                | 87                | 96                | 112            | 5        | 59           | 5497      | 0E+00       | NANOZOOG1409 | -          |
| contig 31           | 2182      | 1409        | 1,8           | 3                  | 1301              | 1                    | 1354                | 87                | 99                | 111            | 5        | 59           | 5492      | 0E+00       | NANOZOOG2177 | +          |
| contig 30           | 1409      | 5744        | 1,8           | 1                  | 1354              | 3                    | 1301                | 87                | 96                | 112            | 5        | 59           | 5497      | 0E+00       | NANOZOOG1409 | -          |
| contig 66           | 5744      | 1409        | 1,8           | 3                  | 1340              | 1                    | 1354                | 90                | 100               | 112            | 4        | 20           | 5706      | 0E+00       | NANOZOOG5732 | +          |
| contig 30           | 1428      | 1430        | 1,0           | 1                  | 294               | 1                    | 290                 | 99                | 58                | 0              | 1        | 4            | 1501      | 0E+00       | NANOZOOG1428 | -          |
| contig 30           | 1430      | 1428        | 1,0           | 154                | 290               | 1                    | 137                 | 100               | 47                | 0              | 0        | 0            | 701       | 5E-92       | NANOZOOG1429 | +          |
| contig 30           | 1500      | 1501        | 0,7           | 15                 | 276               | 30                   | 296                 | 76                | 94                | 55             | 4        | 9            | 1038      | 9E-144      | NANOZOOG1499 | -          |
| contig 30           | 1501      | 1500        | 0,7           | 1                  | 301               | 1                    | 301                 | 100               | 100               | 0              | 0        | 0            | 1566      | 0E+00       | NANOZOOG1500 | -          |
| contig 30           | 1515      | 1516        | 0,6           | 1                  | 189               | 31                   | 219                 | 100               | 99                | 0              | 0        | 0            | 983       | 3E-138      | NANOZOOG1514 | +          |
| contig 30           | 1516      | 1515        | 0,6           | 31                 | 219               | 1                    | 189                 | 100               | 86                | 0              | 0        | 0            | 983       | 3E-138      | NANOZOOG1515 | -          |
| contig 30           | 1587      | 1588        | 0,2           | 1                  | 204               | 1                    | 242                 | 84                | 100               | 0              | 1        | 38           | 782       | 4E-103      | NANOZOOG1586 | -          |
| contig 30           | 1588      | 1587        | 0,2           | 1                  | 242               | 1                    | 204                 | 84                | 38                | 0              | 1        | 38           | 782       | 1E-102      | NANOZOOG1587 | +          |
| contig 30           | 1749      | 1763        | 1,0           | 1                  | 509               | 1                    | 551                 | 64                | 89                | 80             | 13       | 134          | 1713      | 0E+00       | NANOZOOG1746 | +          |
| contig 30           | 1763      | 1749        | 1,0           | 1                  | 551               | 1                    | 509                 | 64                | 84                | 80             | 13       | 134          | 1713      | 0E+00       | NANOZOOG1760 | -          |
| contig 30           | 1886      | 5661        | 0,5           | 140                | 358               | 120                  | 337                 | 73                | 59                | 47             | 4        | 15           | 702       | 4E-91       | NANOZOOG1883 | -          |
|                     |           |             |               | 1                  | 27                | 74                   | 100                 | 96                | 8                 | 1              | 0        | 0            | 133       | 3E-09       |              |            |
| contig 66           | 5661      | 1886        | 0,5           | 122                | 337               | 142                  | 358                 | 75                | 64                | 51             | 3        | 3            | 767       | 6E-101      | NANOZOOG5649 | -          |

|           |      |      |     |     |      |     |      |     |     |     |    |    |      |        |              |   |
|-----------|------|------|-----|-----|------|-----|------|-----|-----|-----|----|----|------|--------|--------------|---|
|           |      |      |     | 74  | 100  | 1   | 27   | 96  | 8   | 1   | 0  | 0  | 134  | 3E-09  |              |   |
| contig 30 | 1917 | 1931 | 0,7 | 67  | 400  | 170 | 511  | 64  | 82  | 105 | 4  | 22 | 1137 | 1E-153 | NANOZOOG1914 | + |
| contig 30 | 1931 | 1917 | 0,7 | 142 | 511  | 47  | 400  | 60  | 68  | 119 | 6  | 30 | 1137 | 1E-153 | NANOZOOG1927 | + |
| contig 30 | 1960 | 2182 | 1,8 | 24  | 830  | 1   | 736  | 80  | 89  | 93  | 6  | 71 | 2959 | 0E+00  | NANOZOOG1956 | + |
| contig 31 | 2182 | 1960 | 1,8 | 1   | 736  | 24  | 830  | 80  | 56  | 89  | 6  | 71 | 3017 | 0E+00  | NANOZOOG2177 | + |
| contig 30 | 1960 | 5744 | 1,8 | 24  | 830  | 1   | 776  | 83  | 93  | 103 | 4  | 31 | 3158 | 0E+00  | NANOZOOG1956 | + |
| contig 66 | 5744 | 1960 | 1,8 | 24  | 830  | 1   | 776  | 83  | 93  | 103 | 4  | 31 | 3158 | 0E+00  | NANOZOOG5732 | + |
| contig 31 | 2140 | 2163 | 1,8 | 1   | 856  | 1   | 837  | 91  | 97  | 52  | 2  | 25 | 4077 | 0E+00  | NANOZOOG2135 | + |
| contig 31 | 2163 | 2140 | 1,8 | 1   | 837  | 1   | 856  | 91  | 100 | 52  | 2  | 25 | 4077 | 0E+00  | NANOZOOG2158 | + |
| contig 31 | 2182 | 5744 | 1,8 | 1   | 1301 | 1   | 1340 | 85  | 98  | 130 | 7  | 75 | 5228 | 0E+00  | NANOZOOG2177 | + |
| contig 66 | 5744 | 2182 | 1,8 | 1   | 1340 | 1   | 1301 | 85  | 96  | 129 | 7  | 75 | 5233 | 0E+00  | NANOZOOG5732 | + |
| contig 38 | 2814 | 2815 | 1,1 | 2   | 354  | 1   | 366  | 96  | 99  | 0   | 1  | 13 | 1752 | 0E+00  | NANOZOOG2808 | - |
| contig 38 | 2815 | 2814 | 1,1 | 1   | 366  | 2   | 354  | 96  | 96  | 0   | 1  | 13 | 1752 | 0E+00  | NANOZOOG2809 | + |
| contig 38 | 3048 | 3049 | 1,1 | 460 | 804  | 1   | 345  | 100 | 41  | 0   | 0  | 0  | 1848 | 0E+00  | NANOZOOG3042 | - |
| contig 38 | 3049 | 3048 | 1,1 | 1   | 345  | 460 | 804  | 100 | 100 | 0   | 0  | 0  | 1848 | 0E+00  | NANOZOOG3043 | + |
| contig 38 | 3071 | 3073 | 0,4 | 4   | 156  | 15  | 161  | 95  | 11  | 2   | 1  | 6  | 624  | 3E-74  | NANOZOOG3065 | - |
| contig 38 | 3073 | 3071 | 0,4 | 12  | 161  | 1   | 156  | 95  | 68  | 2   | 1  | 6  | 698  | 3E-85  | NANOZOOG3067 | + |
| contig 39 | 3191 | 3192 | 1,3 | 98  | 659  | 1   | 534  | 93  | 76  | 12  | 3  | 28 | 2647 | 0E+00  | NANOZOOG3184 | - |
| contig 39 | 3192 | 3191 | 1,3 | 1   | 534  | 98  | 659  | 93  | 100 | 12  | 3  | 28 | 2647 | 0E+00  | NANOZOOG3185 | + |
| contig 39 | 3207 | 3228 | 0,2 | 1   | 258  | 82  | 334  | 38  | 96  | 146 | 8  | 17 | 415  | 2E-49  | NANOZOOG3200 | + |
| contig 39 | 3228 | 3207 | 0,2 | 82  | 334  | 1   | 258  | 38  | 74  | 149 | 7  | 15 | 371  | 8E-43  | NANOZOOG3221 | + |
| contig 39 | 3262 | 3263 | 1,1 | 24  | 450  | 1   | 421  | 79  | 92  | 73  | 3  | 16 | 1672 | 0E+00  | NANOZOOG3255 | - |
| contig 39 | 3263 | 3262 | 1,1 | 1   | 421  | 24  | 450  | 79  | 99  | 73  | 3  | 16 | 1662 | 0E+00  | NANOZOOG3256 | - |
| contig 10 | 38   | 24   | 1,4 | 1   | 578  | 1   | 602  | 74  | 75  | 131 | 3  | 24 | 2256 | 0E+00  | NANOZOOG39   | + |
| contig 10 | 24   | 38   | 1,4 | 1   | 602  | 1   | 578  | 74  | 92  | 131 | 3  | 24 | 2222 | 0E+00  | NANOZOOG25   | - |
| contig 45 | 3996 | 4172 | 1,2 | 1   | 394  | 106 | 499  | 93  | 100 | 27  | 0  | 0  | 1889 | 0E+00  | NANOZOOG3989 | - |
| contig 46 | 4172 | 3996 | 1,2 | 106 | 499  | 1   | 394  | 93  | 41  | 27  | 0  | 0  | 1889 | 0E+00  | NANOZOOG4164 | + |
| contig 45 | 3997 | 4172 | 0,1 | 88  | 116  | 1   | 29   | 97  | 25  | 1   | 0  | 0  | 147  | 1E-12  | NANOZOOG3990 | - |
| contig 46 | 4172 | 3997 | 0,1 | 1   | 29   | 88  | 116  | 97  | 3   | 1   | 0  | 0  | 147  | 9E-12  | NANOZOOG4164 | + |
| contig 45 | 3999 | 4000 | 0,3 | 310 | 403  | 1   | 94   | 100 | 8   | 0   | 0  | 0  | 496  | 4E-59  | NANOZOOG3992 | + |
| contig 45 | 4000 | 3999 | 0,3 | 1   | 94   | 310 | 403  | 100 | 100 | 0   | 0  | 0  | 496  | 4E-60  | NANOZOOG3993 | - |
| contig 45 | 3999 | 645  | 0,4 | 590 | 1109 | 743 | 1251 | 36  | 45  | 318 | 10 | 15 | 784  | 3E-87  | NANOZOOG3992 | + |
|           |      |      |     | 147 | 536  | 218 | 607  | 31  | 34  | 254 | 11 | 26 | 383  | 1E-37  |              |   |
| contig 11 | 645  | 3999 | 0,4 | 743 | 1251 | 590 | 1109 | 37  | 40  | 311 | 11 | 23 | 785  | 2E-87  | NANOZOOG645  | + |
|           |      |      |     | 218 | 607  | 147 | 536  | 30  | 30  | 255 | 10 | 26 | 380  | 3E-37  |              |   |
| contig 45 | 4016 | 4020 | 1,1 | 1   | 381  | 1   | 429  | 84  | 98  | 21  | 3  | 48 | 1783 | 0E+00  | NANOZOOG4008 | + |
| contig 45 | 4020 | 4016 | 1,1 | 1   | 437  | 1   | 389  | 84  | 89  | 22  | 3  | 48 | 1815 | 0E+00  | NANOZOOG4012 | - |
| contig 45 | 4044 | 4049 | 1,5 | 1   | 562  | 1   | 540  | 96  | 96  | 1   | 1  | 22 | 2725 | 0E+00  | NANOZOOG4036 | + |
| contig 45 | 4049 | 4044 | 1,5 | 1   | 540  | 1   | 562  | 96  | 93  | 1   | 1  | 22 | 2725 | 0E+00  | NANOZOOG4041 | - |
| contig 5  | 4319 | 4337 | 0,9 | 85  | 390  | 23  | 320  | 94  | 76  | 9   | 1  | 8  | 1470 | 0E+00  | NANOZOOG4311 | - |
| contig 5  | 4337 | 4319 | 0,9 | 23  | 320  | 85  | 390  | 94  | 93  | 9   | 1  | 8  | 1470 | 0E+00  | NANOZOOG4329 | + |

|                |      |      |     |      |      |      |      |     |     |     |    |    |      |        |                  |   |
|----------------|------|------|-----|------|------|------|------|-----|-----|-----|----|----|------|--------|------------------|---|
| contig 5       | 4320 | 4333 | 1,8 | 1324 | 2016 | 1540 | 2279 | 89  | 33  | 3   | 3  | 83 | 3530 | 0E+00  | NANOZOOG431<br>2 | - |
|                |      |      |     | 693  | 1206 | 865  | 1314 | 82  | 22  | 26  | 4  | 66 | 1994 | 0E+00  |                  |   |
|                |      |      |     | 1    | 296  | 123  | 418  | 100 | 15  | 1   | 0  | 0  | 1641 | 0E+00  |                  |   |
|                |      |      |     | 297  | 526  | 562  | 791  | 99  | 11  | 3   | 0  | 0  | 1172 | 1E-130 |                  |   |
| contig 5       | 4333 | 4320 | 1,8 | 1540 | 2279 | 1324 | 2016 | 89  | 30  | 3   | 3  | 83 | 3522 | 0E+00  | NANOZOOG432<br>5 | + |
|                |      |      |     | 862  | 1319 | 690  | 1211 | 81  | 20  | 33  | 3  | 64 | 2004 | 0E+00  |                  |   |
|                |      |      |     | 123  | 418  | 1    | 296  | 100 | 13  | 1   | 0  | 0  | 1638 | 0E+00  |                  |   |
|                |      |      |     | 562  | 791  | 297  | 526  | 99  | 10  | 3   | 0  | 0  | 1169 | 2E-130 |                  |   |
| contig 5       | 4350 | 4351 | 0,5 | 1    | 161  | 1    | 161  | 100 | 74  | 0   | 0  | 0  | 832  | 2E-113 | NANOZOOG434<br>2 | - |
| contig 5       | 4351 | 4350 | 0,5 | 1    | 161  | 1    | 161  | 100 | 55  | 0   | 0  | 0  | 833  | 1E-113 | NANOZOOG434<br>3 | + |
| contig 5       | 4513 | 4514 | 0,3 | 52   | 162  | 1    | 111  | 100 | 59  | 0   | 0  | 0  | 556  | 9E-75  | NANOZOOG450<br>3 | - |
| contig 5       | 4514 | 4513 | 0,3 | 1    | 111  | 52   | 162  | 100 | 100 | 0   | 0  | 0  | 556  | 5E-75  | NANOZOOG450<br>4 | - |
| contig 5       | 4606 | 4608 | 1,6 | 56   | 519  | 67   | 530  | 99  | 89  | 6   | 0  | 0  | 2485 | 0E+00  | NANOZOOG459<br>6 | + |
| contig 5       | 4608 | 4606 | 1,6 | 67   | 530  | 56   | 519  | 99  | 88  | 6   | 0  | 0  | 2485 | 0E+00  | NANOZOOG459<br>7 | - |
| contig 5       | 4665 | 5915 | 0,5 | 1    | 364  | 21   | 377  | 50  | 95  | 164 | 10 | 23 | 815  | 2E-107 | NANOZOOG465<br>4 | - |
| contig 7       | 5915 | 4665 | 0,5 | 21   | 377  | 1    | 364  | 50  | 93  | 162 | 11 | 23 | 832  | 7E-110 | NANOZOOG590<br>3 | + |
| contig 5       | 4799 | 4806 | 0,6 | 5    | 359  | 1    | 357  | 69  | 93  | 72  | 7  | 46 | 1096 | 3E-150 | NANOZOOG478<br>8 | + |
| contig 5       | 4806 | 4799 | 0,6 | 1    | 357  | 5    | 359  | 69  | 93  | 73  | 6  | 42 | 1110 | 2E-152 | NANOZOOG479<br>5 | - |
| contig 5       | 4820 | 4821 | 1,8 | 1    | 577  | 93   | 669  | 100 | 65  | 1   | 0  | 0  | 3107 | 0E+00  | NANOZOOG480<br>9 | - |
|                |      |      |     | 452  | 735  | 1    | 305  | 25  | 31  | 202 | 5  | 31 | 226  | 2E-19  |                  |   |
| contig 5       | 4821 | 4820 | 1,8 | 93   | 669  | 1    | 577  | 100 | 86  | 1   | 0  | 0  | 3107 | 0E+00  | NANOZOOG481<br>0 | + |
|                |      |      |     | 1    | 305  | 452  | 735  | 25  | 42  | 202 | 5  | 31 | 226  | 2E-19  |                  |   |
| contig 5       | 4904 | 6916 | 0,5 | 1    | 300  | 15   | 318  | 57  | 94  | 114 | 7  | 22 | 841  | 6E-113 | NANOZOOG489<br>3 | - |
| scaffold<br>49 | 6916 | 4904 | 0,5 | 15   | 318  | 1    | 300  | 57  | 88  | 114 | 7  | 22 | 841  | 6E-113 | NANOZOOG690<br>4 | + |
| contig 5       | 4985 | 6431 | 1,8 | 4    | 550  | 127  | 633  | 66  | 49  | 140 | 4  | 50 | 1774 | 0E+00  | NANOZOOG497<br>4 | - |
|                |      |      |     | 599  | 1033 | 722  | 1218 | 64  | 42  | 118 | 5  | 62 | 1600 | 0E+00  |                  |   |
| scaffold<br>40 | 6431 | 4985 | 1,8 | 127  | 633  | 4    | 550  | 66  | 33  | 140 | 4  | 50 | 1821 | 0E+00  | NANOZOOG641<br>9 | - |
|                |      |      |     | 722  | 1218 | 599  | 1033 | 64  | 28  | 118 | 5  | 62 | 1601 | 0E+00  |                  |   |
| contig 62      | 5301 | 5315 | 0,2 | 2    | 209  | 7    | 165  | 41  | 60  | 73  | 4  | 49 | 363  | 1E-43  | NANOZOOG529<br>0 | - |
| contig 62      | 5315 | 5301 | 0,2 | 7    | 165  | 2    | 209  | 41  | 96  | 73  | 4  | 49 | 362  | 1E-43  | NANOZOOG530<br>4 | - |
| contig 62      | 5361 | 5364 | 1,0 | 1    | 359  | 30   | 375  | 87  | 92  | 1   | 6  | 47 | 1671 | 0E+00  | NANOZOOG535<br>0 | - |
| contig 62      | 5364 | 5361 | 1,0 | 30   | 375  | 1    | 359  | 87  | 88  | 1   | 6  | 47 | 1671 | 0E+00  | NANOZOOG535<br>3 | + |
| contig 65      | 5478 | 5479 | 0,6 | 232  | 536  | 1    | 305  | 100 | 57  | 0   | 0  | 0  | 1542 | 0E+00  | NANOZOOG546<br>7 | + |
| contig 65      | 5479 | 5478 | 0,6 | 1    | 305  | 232  | 536  | 100 | 100 | 0   | 0  | 0  | 1542 | 0E+00  | NANOZOOG546<br>8 | - |
| contig 65      | 5489 | 5490 | 1,8 | 50   | 611  | 1    | 552  | 98  | 66  | 1   | 1  | 10 | 2919 | 0E+00  | NANOZOOG547<br>8 | - |
| contig 65      | 5490 | 5489 | 1,8 | 1    | 552  | 50   | 611  | 98  | 100 | 1   | 1  | 10 | 2919 | 0E+00  | NANOZOOG547<br>9 | + |
| contig 7       | 5795 | 5796 | 1,8 | 100  | 917  | 1    | 818  | 100 | 60  | 0   | 0  | 0  | 4320 | 0E+00  | NANOZOOG578<br>3 | + |
| contig 7       | 5796 | 5795 | 1,8 | 1    | 818  | 100  | 917  | 100 | 100 | 0   | 0  | 0  | 4320 | 0E+00  | NANOZOOG578<br>4 | - |
| scaffold<br>40 | 6488 | 6489 | 1,8 | 532  | 1212 | 1    | 615  | 87  | 38  | 18  | 5  | 72 | 3034 | 0E+00  | NANOZOOG647<br>6 | + |
| scaffold<br>40 | 6489 | 6488 | 1,8 | 1    | 615  | 532  | 1212 | 87  | 100 | 18  | 5  | 72 | 3034 | 0E+00  | NANOZOOG647<br>7 | - |
| scaffold<br>40 | 6541 | 6542 | 0,8 | 5    | 260  | 1    | 256  | 100 | 98  | 1   | 0  | 0  | 1340 | 0E+00  | NANOZOOG652<br>9 | + |
| scaffold<br>40 | 6542 | 6541 | 0,8 | 1    | 256  | 5    | 260  | 100 | 99  | 1   | 0  | 0  | 1340 | 0E+00  | NANOZOOG653<br>0 | - |
| contig 11      | 662  | 663  | 0,3 | 2    | 137  | 1    | 178  | 75  | 99  | 2   | 1  | 42 | 621  | 6E-84  | NANOZOOG662      | - |

|             |      |      |     |     |      |     |      |     |     |   |   |    |      |        |             |   |
|-------------|------|------|-----|-----|------|-----|------|-----|-----|---|---|----|------|--------|-------------|---|
| contig 11   | 663  | 662  | 0,3 | 1   | 178  | 2   | 137  | 75  | 60  | 3 | 2 | 42 | 628  | 9E-85  | NANOZOOG663 | + |
| scaffold 40 | 6688 | 6689 | 0,5 | 117 | 340  | 1   | 224  | 100 | 64  | 0 | 0 | 0  | 1147 | 2E-160 | NANOZOOG667 | + |
| scaffold 40 | 6689 | 6688 | 0,5 | 1   | 224  | 117 | 340  | 100 | 100 | 0 | 0 | 0  | 1147 | 1E-160 | NANOZOOG667 | - |
| scaffold 49 | 6849 | 6850 | 0,4 | 237 | 413  | 3   | 179  | 100 | 39  | 0 | 0 | 0  | 887  | 6E-120 | NANOZOOG683 | + |
| scaffold 49 | 6850 | 6849 | 0,4 | 3   | 179  | 237 | 413  | 100 | 99  | 0 | 0 | 0  | 887  | 2E-120 | NANOZOOG683 | - |
| scaffold 49 | 6968 | 6969 | 1,0 | 1   | 302  | 1   | 302  | 100 | 91  | 1 | 0 | 0  | 1611 | 0E+00  | NANOZOOG695 | + |
| scaffold 49 | 6969 | 6968 | 1,0 | 1   | 302  | 1   | 302  | 100 | 100 | 1 | 0 | 0  | 1611 | 0E+00  | NANOZOOG695 | - |
| scaffold 6  | 7285 | 7300 | 0,3 | 52  | 162  | 1   | 111  | 100 | 69  | 0 | 0 | 0  | 554  | 7E-75  | NANOZOOG727 | - |
| scaffold 6  | 7300 | 7285 | 0,3 | 1   | 111  | 52  | 162  | 100 | 100 | 0 | 0 | 0  | 554  | 4E-75  | NANOZOOG728 | - |
| scaffold 6  | 7286 | 7301 | 0,3 | 31  | 144  | 1   | 114  | 100 | 73  | 0 | 0 | 0  | 590  | 3E-80  | NANOZOOG727 | + |
| scaffold 6  | 7301 | 7286 | 0,3 | 1   | 114  | 31  | 144  | 100 | 90  | 0 | 0 | 0  | 590  | 2E-80  | NANOZOOG728 | - |
| scaffold 6  | 7312 | 7313 | 1,8 | 461 | 1837 | 1   | 1371 | 100 | 74  | 0 | 2 | 6  | 7255 | 0E+00  | NANOZOOG729 | - |
| scaffold 6  | 7313 | 7312 | 1,8 | 1   | 1371 | 461 | 1837 | 100 | 100 | 0 | 2 | 6  | 7255 | 0E+00  | NANOZOOG729 | + |

**Supplementary Table S11.** Alignment statistics of the duplicated genes identified in the *Rhodotorula babjevae* DBVPG 8058 genome by OrthoVenn2

| Contig/<br>scaffold | Quer<br>y | Subjec<br>t | inflatio<br>n | Query<br>start | Quer<br>y<br>end | Subjec<br>t<br>start | Subjec<br>t<br>end | %<br>identit<br>y | %<br>coverag<br>e | Mismatche<br>s | Gap<br>s | Gap<br>Bases | Scor<br>e | E-<br>Value | Gene ID     | Stran<br>d |
|---------------------|-----------|-------------|---------------|----------------|------------------|----------------------|--------------------|-------------------|-------------------|----------------|----------|--------------|-----------|-------------|-------------|------------|
| contig 1            | 7         | 8           | 0,7           | 1              | 215              | 65                   | 279                | 100               | 73                | 0              | 0        | 0            | 1152      | 3E-161      | NANOZOOG8   | -          |
| contig 1            | 8         | 7           | 0,7           | 65             | 279              | 1                    | 215                | 100               | 77                | 0              | 0        | 0            | 1152      | 3E-161      | NANOZOOG9   | +          |
| contig 33           | 450       | 490         | 0,1           | 1              | 87               | 10                   | 79                 | 45                | 47                | 31             | 1        | 17           | 189       | 3E-19       | NANOZOOG450 | -          |
| contig 33           | 490       | 450         | 0,1           | 10             | 79               | 1                    | 87                 | 45                | 47                | 31             | 1        | 17           | 185       | 9E-19       | NANOZOOG490 | -          |
| contig 38           | 699       | 700         | 0,6           | 4              | 341              | 1                    | 382                | 53                | 98                | 129            | 4        | 54           | 982       | 4E-133      | NANOZOOG699 | -          |
| contig 38           | 700       | 699         | 0,6           | 1              | 382              | 4                    | 341                | 53                | 87                | 129            | 4        | 54           | 982       | 5E-133      | NANOZOOG700 | -          |
| contig 38           | 881       | 918         | 0,3           | 1              | 131              | 1                    | 131                | 99                | 100               | 1              | 0        | 0            | 657       | 8E-91       | NANOZOOG881 | +          |
| contig 38           | 918       | 881         | 0,3           | 1              | 131              | 1                    | 131                | 99                | 96                | 1              | 0        | 0            | 657       | 8E-91       | NANOZOOG918 | +          |
| contig 40           | 1190      | 1191        | 0,8           | 117            | 447              | 1                    | 333                | 99                | 74                | 0              | 1        | 2            | 1702      | 0E+00       | NANOZOOG118 | +          |
| contig 40           | 1191      | 1190        | 0,8           | 1              | 333              | 117                  | 447                | 99                | 99                | 0              | 1        | 2            | 1702      | 0E+00       | NANOZOOG119 | -          |



|           |      |      |     |     |      |     |      |     |     |     |    |     |      |        |              |   |
|-----------|------|------|-----|-----|------|-----|------|-----|-----|-----|----|-----|------|--------|--------------|---|
| contig 42 | 1575 | 1576 | 1,0 | 22  | 597  | 2   | 623  | 54  | 95  | 238 | 5  | 52  | 1710 | 0E+00  | NANOZOOG1573 | + |
| contig 42 | 1576 | 1575 | 1,0 | 13  | 623  | 33  | 597  | 54  | 90  | 232 | 5  | 52  | 1694 | 0E+00  | NANOZOOG1574 | + |
| contig 42 | 1638 | 1639 | 0,2 | 3   | 90   | 1   | 88   | 98  | 63  | 2   | 0  | 0   | 443  | 1E-58  | NANOZOOG1636 | + |
| contig 42 | 1639 | 1638 | 0,2 | 1   | 88   | 3   | 90   | 98  | 100 | 2   | 0  | 0   | 443  | 6E-59  | NANOZOOG1637 | - |
| contig 42 | 1914 | 1926 | 1,1 | 1   | 581  | 1   | 621  | 66  | 78  | 167 | 6  | 42  | 1547 | 0E+00  | NANOZOOG1911 | - |
|           |      |      |     | 632 | 733  | 768 | 869  | 81  | 14  | 19  | 0  | 0   | 420  | 4E-43  |              |   |
| contig 42 | 1926 | 1914 | 1,1 | 1   | 621  | 1   | 581  | 66  | 66  | 171 | 5  | 42  | 1545 | 0E+00  | NANOZOOG1923 | + |
|           |      |      |     | 768 | 882  | 632 | 742  | 79  | 13  | 20  | 1  | 4   | 437  | 3E-45  |              |   |
| contig 42 | 2011 | 2024 | 0,2 | 1   | 280  | 1   | 278  | 40  | 98  | 161 | 4  | 10  | 352  | 2E-40  | NANOZOOG2008 | + |
| contig 42 | 2024 | 2011 | 0,2 | 1   | 278  | 1   | 280  | 35  | 94  | 156 | 5  | 36  | 354  | 8E-41  | NANOZOOG2021 | - |
| contig 45 | 2239 | 4377 | 0,3 | 1   | 236  | 1   | 227  | 49  | 96  | 112 | 3  | 9   | 489  | 1E-60  | NANOZOOG2235 | + |
| contig 65 | 4377 | 2239 | 0,3 | 1   | 227  | 1   | 236  | 49  | 64  | 112 | 3  | 9   | 486  | 4E-60  | NANOZOOG4367 | + |
| contig 47 | 2581 | 2590 | 1,6 | 1   | 800  | 1   | 754  | 67  | 93  | 206 | 9  | 64  | 2524 | 0E+00  | NANOZOOG2573 | - |
| contig 47 | 2590 | 2581 | 1,6 | 1   | 541  | 1   | 541  | 79  | 71  | 110 | 2  | 2   | 2102 | 0E+00  | NANOZOOG2582 | - |
|           |      |      |     | 609 | 754  | 631 | 800  | 57  | 19  | 49  | 1  | 24  | 507  | 2E-54  |              |   |
| contig 47 | 2601 | 2627 | 0,8 | 1   | 414  | 1   | 343  | 68  | 82  | 59  | 6  | 75  | 1356 | 0E+00  | NANOZOOG2593 | + |
| contig 47 | 2627 | 2601 | 0,8 | 1   | 343  | 1   | 414  | 68  | 99  | 60  | 6  | 75  | 1324 | 0E+00  | NANOZOOG2619 | + |
| contig 47 | 2722 | 2726 | 1,1 | 17  | 419  | 1   | 395  | 88  | 90  | 25  | 4  | 24  | 1764 | 0E+00  | NANOZOOG2714 | - |
| contig 47 | 2726 | 2722 | 1,1 | 1   | 395  | 17  | 419  | 87  | 98  | 30  | 4  | 24  | 1687 | 0E+00  | NANOZOOG2718 | + |
| contig 48 | 2976 | 2977 | 0,9 | 664 | 1001 | 1   | 338  | 100 | 29  | 0   | 0  | 0   | 1753 | 0E+00  | NANOZOOG2967 | - |
| contig 48 | 2977 | 2976 | 0,9 | 1   | 338  | 664 | 1001 | 100 | 100 | 0   | 0  | 0   | 1753 | 0E+00  | NANOZOOG2968 | + |
| contig 48 | 3002 | 3004 | 0,3 | 291 | 456  | 99  | 237  | 64  | 30  | 32  | 1  | 27  | 573  | 1E-71  | NANOZOOG2993 | + |
| contig 48 | 3004 | 3002 | 0,3 | 57  | 237  | 238 | 456  | 56  | 73  | 58  | 2  | 38  | 595  | 3E-75  | NANOZOOG2995 | + |
| contig 51 | 3445 | 3446 | 1,8 | 749 | 1312 | 91  | 654  | 100 | 33  | 1   | 0  | 0   | 2994 | 0E+00  | NANOZOOG3436 | - |
|           |      |      |     | 560 | 650  | 1   | 91   | 100 | 5   | 0   | 0  | 0   | 487  | 2E-51  |              |   |
| contig 51 | 3446 | 3445 | 1,8 | 91  | 654  | 749 | 1312 | 100 | 86  | 1   | 0  | 0   | 2994 | 0E+00  | NANOZOOG3437 | + |
|           |      |      |     | 1   | 91   | 560 | 650  | 100 | 14  | 0   | 0  | 0   | 487  | 9E-52  |              |   |
| contig 51 | 3500 | 4822 | 1,8 | 711 | 1428 | 683 | 1451 | 54  | 48  | 261 | 11 | 109 | 2049 | 0E+00  | NANOZOOG3491 | + |
|           |      |      |     | 31  | 470  | 24  | 403  | 57  | 26  | 125 | 7  | 68  | 1157 | 9E-135 |              |   |
|           |      |      |     | 572 | 701  | 404 | 575  | 45  | 9   | 53  | 1  | 42  | 359  | 2E-34  |              |   |
| contig 69 | 4822 | 3500 | 1,8 | 683 | 1239 | 711 | 1222 | 67  | 35  | 140 | 2  | 45  | 1964 | 0E+00  | NANOZOOG4811 | + |
|           |      |      |     | 24  | 403  | 31  | 470  | 57  | 26  | 125 | 7  | 68  | 1154 | 3E-134 |              |   |
|           |      |      |     | 404 | 575  | 572 | 701  | 45  | 9   | 53  | 1  | 42  | 310  | 1E-28  |              |   |
| contig 53 | 3517 | 7028 | 0,7 | 1   | 224  | 29  | 252  | 98  | 100 | 5   | 0  | 0   | 1118 | 1E-157 | NANOZOOG3508 | - |
| contig 86 | 7028 | 3517 | 0,7 | 29  | 252  | 1   | 224  | 98  | 89  | 5   | 0  | 0   | 1118 | 1E-157 | NANOZOOG6994 | - |
| contig 69 | 4979 | 4980 | 1,8 | 1   | 620  | 51  | 670  | 100 | 93  | 1   | 0  | 0   | 3319 | 0E+00  | NANOZOOG4967 | + |
|           |      |      |     | 505 | 669  | 6   | 175  | 28  | 24  | 114 | 3  | 9   | 175  | 2E-13  |              |   |
| contig 69 | 4980 | 4979 | 1,8 | 51  | 670  | 1   | 620  | 100 | 93  | 1   | 0  | 0   | 3319 | 0E+00  | NANOZOOG4968 | - |
|           |      |      |     | 6   | 175  | 505 | 669  | 28  | 24  | 114 | 3  | 9   | 175  | 2E-13  |              |   |
| contig 69 | 5060 | 5062 | 1,8 | 204 | 999  | 2   | 956  | 76  | 80  | 69  | 9  | 159 | 3159 | 0E+00  | NANOZOOG5048 | + |
| contig 69 | 5062 | 5060 | 1,8 | 2   | 956  | 204 | 999  | 76  | 83  | 69  | 9  | 159 | 3148 | 0E+00  | NANOZOOG5049 | - |
| contig 70 | 5308 | 5318 | 0,3 | 1   | 122  | 1   | 122  | 100 | 76  | 0   | 0  | 0   | 620  | 8E-85  | NANOZOOG5294 | - |
| contig 70 | 5318 | 5308 | 0,3 | 1   | 122  | 1   | 122  | 100 | 100 | 0   | 0  | 0   | 620  | 6E-85  | NANOZOOG5304 | + |

|             |      |      |     |     |      |     |      |     |     |     |   |    |      |        |              |   |
|-------------|------|------|-----|-----|------|-----|------|-----|-----|-----|---|----|------|--------|--------------|---|
| contig 70   | 5308 | 6580 | 0,3 | 5   | 159  | 1   | 156  | 84  | 96  | 20  | 2 | 5  | 615  | 1E-83  | NANOZOOG5294 | - |
| contig 82   | 6580 | 5308 | 0,3 | 1   | 156  | 5   | 159  | 84  | 97  | 21  | 2 | 5  | 597  | 7E-81  | NANOZOOG6562 | + |
| contig 70   | 5329 | 5332 | 1,8 | 156 | 1230 | 1   | 1061 | 99  | 50  | 0   | 1 | 14 | 5626 | 0E+00  | NANOZOOG5315 | - |
| contig 70   | 5332 | 5329 | 1,8 | 1   | 1061 | 156 | 1230 | 99  | 100 | 0   | 1 | 14 | 5626 | 0E+00  | NANOZOOG5318 | + |
| contig 73   | 5763 | 5786 | 1,8 | 77  | 786  | 1   | 709  | 89  | 84  | 31  | 3 | 47 | 3375 | 0E+00  | NANOZOOG5747 | + |
| contig 73   | 5786 | 5763 | 1,8 | 1   | 709  | 77  | 786  | 89  | 97  | 31  | 3 | 47 | 3376 | 0E+00  | NANOZOOG5770 | + |
| contig 74   | 5904 | 5905 | 0,5 | 270 | 534  | 1   | 265  | 100 | 49  | 0   | 0 | 0  | 1317 | 0E+00  | NANOZOOG5888 | + |
| contig 74   | 5905 | 5904 | 0,5 | 1   | 265  | 270 | 534  | 100 | 100 | 0   | 0 | 0  | 1317 | 0E+00  | NANOZOOG5889 | - |
| contig 74   | 5915 | 5916 | 1,8 | 50  | 609  | 1   | 549  | 98  | 59  | 1   | 1 | 11 | 2905 | 0E+00  | NANOZOOG5899 | - |
| contig 74   | 5916 | 5915 | 1,8 | 1   | 549  | 50  | 609  | 98  | 100 | 1   | 1 | 11 | 2905 | 0E+00  | NANOZOOG5900 | + |
| contig 77   | 6501 | 6510 | 1,8 | 1   | 750  | 1   | 703  | 91  | 94  | 18  | 2 | 47 | 3469 | 0E+00  | NANOZOOG6483 | - |
| contig 77   | 6510 | 6501 | 1,8 | 1   | 703  | 1   | 750  | 91  | 100 | 18  | 2 | 47 | 3469 | 0E+00  | NANOZOOG6492 | + |
| contig 84   | 6685 | 6687 | 0,7 | 2   | 464  | 3   | 482  | 53  | 98  | 200 | 4 | 29 | 1155 | 1E-155 | NANOZOOG6667 | - |
| contig 84   | 6687 | 6685 | 0,7 | 3   | 482  | 2   | 464  | 53  | 94  | 194 | 5 | 37 | 1214 | 9E-165 | NANOZOOG6669 | - |
| scaffold 52 | 7488 | 7489 | 1,2 | 80  | 443  | 1   | 368  | 99  | 81  | 0   | 2 | 4  | 1911 | 0E+00  | NANOZOOG7454 | + |
| scaffold 52 | 7489 | 7488 | 1,2 | 1   | 368  | 80  | 443  | 99  | 99  | 0   | 2 | 4  | 1911 | 0E+00  | NANOZOOG7455 | - |
| scaffold 52 | 7497 | 7498 | 1,4 | 1   | 501  | 10  | 515  | 99  | 100 | 0   | 1 | 5  | 2509 | 0E+00  | NANOZOOG7463 | - |
| scaffold 52 | 7498 | 7497 | 1,4 | 10  | 515  | 1   | 501  | 99  | 97  | 0   | 1 | 5  | 2509 | 0E+00  | NANOZOOG7464 | + |

**Supplementary Table S12.** Alignment statistics of the duplicated genes identified in the *Rhodotorula babjevae* CBS 7808 genome by BLASTp

| Contig/<br>scaffold | Query | Subject | Query<br>start | Query<br>stop | Subject<br>start | Subject<br>stop | %<br>Identity | %<br>coverage | Mismatches | Gaps | Gap<br>Bases | Score | E-Value | Gene ID      | Strad |
|---------------------|-------|---------|----------------|---------------|------------------|-----------------|---------------|---------------|------------|------|--------------|-------|---------|--------------|-------|
| contig 10           | 24    | 38      | 1              | 602           | 1                | 578             | 74            | 92            | 131        | 3    | 24           | 2222  | 0E+00   | NANOZOOG25   | -     |
| contig 10           | 38    | 24      | 1              | 578           | 1                | 602             | 74            | 75            | 131        | 3    | 24           | 2256  | 0E+00   | NANOZOOG39   | +     |
| contig 10           | 84    | 701     | 12             | 359           | 1                | 401             | 68            | 94            | 66         | 7    | 63           | 1338  | 0E+00   | NANOZOOG85   | -     |
| contig 11           | 701   | 84      | 1              | 401           | 12               | 359             | 68            | 84            | 66         | 7    | 63           | 1338  | 0E+00   | NANOZOOG701  | -     |
| contig 10           | 122   | 123     | 8              | 190           | 1                | 211             | 84            | 91            | 5          | 1    | 28           | 873   | 2E-121  | NANOZOOG123  | +     |
| contig 10           | 123   | 122     | 1              | 211           | 8                | 190             | 87            | 87            | 0          | 1    | 28           | 905   | 3E-126  | NANOZOOG124  | -     |
| contig 10           | 326   | 327     | 1              | 330           | 1                | 359             | 73            | 94            | 67         | 4    | 29           | 1258  | 3E-174  | NANOZOOG326  | -     |
| contig 10           | 327   | 326     | 1              | 359           | 1                | 330             | 72            | 79            | 70         | 4    | 29           | 1260  | 2E-174  | NANOZOOG327  | -     |
| contig 12           | 801   | 812     | 1              | 280           | 1                | 304             | 89            | 82            | 8          | 1    | 24           | 1379  | 0E+00   | NANOZOOG801  | +     |
| contig 12           | 812   | 801     | 1              | 304           | 1                | 280             | 89            | 91            | 8          | 1    | 24           | 1379  | 0E+00   | NANOZOOG812  | -     |
| contig 12           | 830   | 831     | 13             | 178           | 1                | 166             | 100           | 93            | 0          | 0    | 0            | 894   | 1E-125  | NANOZOOG830  | +     |
| contig 12           | 831   | 830     | 1              | 166           | 13               | 178             | 100           | 97            | 0          | 0    | 0            | 894   | 1E-125  | NANOZOOG831  | -     |
| contig 30           | 1409  | 5744    | 1              | 1354          | 3                | 1340            | 90            | 99            | 114        | 4    | 20           | 5728  | 0E+00   | NANOZOOG1409 | -     |
| contig 66           | 5744  | 1409    | 3              | 1340          | 1                | 1354            | 90            | 100           | 112        | 4    | 20           | 5706  | 0E+00   | NANOZOOG5732 | +     |
| contig 66           | 5744  | 2182    | 1              | 1340          | 1                | 1301            | 85            | 96            | 129        | 7    | 75           | 5233  | 0E+00   | NANOZOOG5732 | +     |
| contig 31           | 2182  | 5744    | 1              | 1301          | 1                | 1340            | 85            | 98            | 130        | 7    | 75           | 5228  | 0E+00   | NANOZOOG2177 | +     |
| contig 30           | 1409  | 2182    | 1              | 1354          | 3                | 1301            | 87            | 96            | 112        | 5    | 59           | 5497  | 0E+00   | NANOZOOG1409 | -     |
| contig 31           | 2182  | 1409    | 3              | 1301          | 1                | 1354            | 87            | 99            | 111        | 5    | 59           | 5492  | 0E+00   | NANOZOOG2177 | +     |
| contig 30           | 1471  | 1488    | 73             | 364           | 1                | 256             | 87            | 70            | 3          | 2    | 36           | 1222  | 5E-171  | NANOZOOG1470 | -     |
| contig 30           | 1488  | 1471    | 1              | 256           | 73               | 364             | 87            | 100           | 3          | 2    | 36           | 1222  | 4E-171  | NANOZOOG1487 | +     |
| contig 30           | 1500  | 1501    | 15             | 276           | 30               | 296             | 76            | 94            | 55         | 4    | 9            | 1038  | 9E-144  | NANOZOOG1499 | -     |
| contig 30           | 1501  | 1500    | 30             | 296           | 15               | 276             | 76            | 86            | 55         | 4    | 9            | 1037  | 1E-143  | NANOZOOG1500 | -     |
| contig 30           | 1515  | 1516    | 1              | 189           | 31               | 219             | 100           | 99            | 0          | 0    | 0            | 983   | 3E-138  | NANOZOOG1514 | +     |
| contig 30           | 1516  | 1515    | 31             | 219           | 1                | 189             | 100           | 86            | 0          | 0    | 0            | 983   | 3E-138  | NANOZOOG1515 | -     |
| contig 30           | 1851  | 1892    | 42             | 284           | 1                | 209             | 84            | 70            | 1          | 4    | 38           | 992   | 6E-138  | NANOZOOG1848 | -     |
| contig 30           | 1892  | 1851    | 1              | 209           | 42               | 284             | 84            | 99            | 1          | 4    | 38           | 992   | 4E-138  | NANOZOOG1889 | -     |
| contig 31           | 2140  | 2163    | 1              | 856           | 1                | 837             | 91            | 97            | 52         | 2    | 25           | 4077  | 0E+00   | NANOZOOG2135 | +     |
| contig 31           | 2163  | 2140    | 1              | 837           | 1                | 856             | 91            | 100           | 52         | 2    | 25           | 4077  | 0E+00   | NANOZOOG2158 | +     |
| contig 36           | 2615  | 2616    | 16             | 325           | 1                | 266             | 86            | 75            | 0          | 1    | 44           | 959   | 5E-131  | NANOZOOG2609 | +     |
| contig 36           | 2616  | 2615    | 1              | 266           | 16               | 325             | 86            | 100           | 0          | 1    | 44           | 964   | 6E-132  | NANOZOOG2610 | -     |
| contig 37           | 2717  | 2727    | 1              | 574           | 1                | 627             | 79            | 100           | 80         | 2    | 53           | 2379  | 0E+00   | NANOZOOG2711 | -     |
| contig 37           | 2727  | 2717    | 1              | 627           | 1                | 574             | 79            | 92            | 77         | 2    | 53           | 2408  | 0E+00   | NANOZOOG2721 | +     |
| contig 38           | 2814  | 2815    | 2              | 354           | 1                | 366             | 96            | 99            | 0          | 1    | 13           | 1752  | 0E+00   | NANOZOOG2808 | -     |
| contig 38           | 2815  | 2814    | 1              | 366           | 2                | 354             | 96            | 96            | 0          | 1    | 13           | 1752  | 0E+00   | NANOZOOG2809 | +     |
| contig 38           | 2854  | 2877    | 1              | 481           | 1                | 476             | 85            | 97            | 67         | 2    | 7            | 1475  | 0E+00   | NANOZOOG2848 | -     |
| contig 38           | 2877  | 2854    | 1              | 469           | 1                | 474             | 85            | 78            | 66         | 2    | 7            | 1502  | 0E+00   | NANOZOOG2871 | +     |
| contig 38           | 3041  | 3043    | 153            | 610           | 3                | 460             | 100           | 72            | 1          | 0    | 0            | 2369  | 0E+00   | NANOZOOG3035 | +     |
| contig 38           | 3043  | 3041    | 3              | 460           | 153              | 610             | 100           | 100           | 1          | 0    | 0            | 2369  | 0E+00   | NANOZOOG3037 | -     |
| contig 39           | 3191  | 3192    | 98             | 659           | 1                | 534             | 93            | 76            | 12         | 3    | 28           | 2647  | 0E+00   | NANOZOOG3184 | -     |
| contig 39           | 3192  | 3191    | 1              | 534           | 98               | 659             | 93            | 100           | 12         | 3    | 28           | 2647  | 0E+00   | NANOZOOG3185 | +     |
| contig 39           | 3262  | 3263    | 24             | 450           | 1                | 421             | 79            | 92            | 73         | 3    | 16           | 1672  | 0E+00   | NANOZOOG3255 | -     |
| contig 39           | 3263  | 3262    | 1              | 421           | 24               | 450             | 79            | 99            | 73         | 3    | 16           | 1662  | 0E+00   | NANOZOOG3256 | -     |
| contig 45           | 4016  | 4020    | 1              | 381           | 1                | 429             | 84            | 98            | 21         | 3    | 48           | 1783  | 0E+00   | NANOZOOG4008 | +     |
| contig 45           | 4020  | 4016    | 1              | 437           | 1                | 389             | 84            | 89            | 22         | 3    | 48           | 1815  | 0E+00   | NANOZOOG4012 | -     |
| contig 45           | 4044  | 4049    | 1              | 562           | 1                | 540             | 96            | 96            | 1          | 1    | 22           | 2725  | 0E+00   | NANOZOOG4036 | +     |
| contig 45           | 4049  | 4044    | 1              | 540           | 1                | 562             | 96            | 93            | 1          | 1    | 22           | 2725  | 0E+00   | NANOZOOG4041 | -     |
| contig 5            | 4319  | 4337    | 85             | 390           | 23               | 320             | 94            | 76            | 9          | 1    | 8            | 1470  | 0E+00   | NANOZOOG4311 | -     |
| contig 5            | 4337  | 4319    | 23             | 320           | 85               | 390             | 94            | 93            | 9          | 1    | 8            | 1470  | 0E+00   | NANOZOOG4329 | +     |

|             |      |      |     |     |      |     |      |     |    |   |    |      |        |              |              |   |
|-------------|------|------|-----|-----|------|-----|------|-----|----|---|----|------|--------|--------------|--------------|---|
| contig 5    | 4341 | 4342 | 16  | 520 | 1    | 495 | 98   | 95  | 0  | 1 | 10 | 2477 | 0E+00  | NANOZOOG4333 | +            |   |
| contig 5    | 4342 | 4341 | 1   | 495 | 16   | 520 | 98   | 100 | 0  | 1 | 10 | 2477 | 0E+00  | NANOZOOG4334 | -            |   |
| contig 62   | 5361 | 5364 | 1   | 359 | 30   | 375 | 87   | 92  | 1  | 6 | 47 | 1671 | 0E+00  | NANOZOOG5350 | -            |   |
| contig 62   | 5364 | 5361 | 30  | 375 | 1    | 359 | 87   | 88  | 1  | 6 | 47 | 1671 | 0E+00  | NANOZOOG5353 | +            |   |
| contig 7    | 5765 | 5781 | 2   | 401 | 85   | 501 | 78   | 89  | 72 | 3 | 19 | 1543 | 0E+00  | NANOZOOG5753 | +            |   |
| contig 7    | 5781 | 5765 | 84  | 501 | 1    | 401 | 78   | 80  | 72 | 3 | 19 | 1590 | 0E+00  | NANOZOOG5769 | -            |   |
| contig 7    | 5929 | 5930 | 1   | 444 | 147  | 590 | 100  | 100 | 0  | 0 | 0  | 2286 | 0E+00  | NANOZOOG5917 | +            |   |
| contig 7    | 5930 | 5929 | 147 | 590 | 1    | 444 | 100  | 75  | 0  | 0 | 0  | 2286 | 0E+00  | NANOZOOG5918 | -            |   |
| scaffold 40 | 6541 | 6542 | 5   | 260 | 1    | 256 | 100  | 98  | 1  | 0 | 0  | 1340 | 0E+00  | NANOZOOG6529 | +            |   |
| scaffold 40 | 6542 | 6541 | 1   | 256 | 5    | 260 | 100  | 99  | 1  | 0 | 0  | 1340 | 0E+00  | NANOZOOG6530 | -            |   |
| scaffold 49 | 6968 | 6969 | 1   | 302 | 1    | 302 | 100  | 91  | 1  | 0 | 0  | 1611 | 0E+00  | NANOZOOG6956 | +            |   |
| scaffold 49 | 6969 | 6968 | 1   | 302 | 1    | 302 | 100  | 100 | 1  | 0 | 0  | 1611 | 0E+00  | NANOZOOG6957 | -            |   |
| scaffold 6  | 7144 | 7145 | 9   | 163 | 1    | 153 | 95   | 91  | 5  | 1 | 2  | 767  | 1E-106 | NANOZOOG7132 | +            |   |
| scaffold 6  | 7145 | 7144 | 1   | 153 | 9    | 163 | 95   | 100 | 5  | 1 | 2  | 767  | 1E-106 | NANOZOOG7133 | +            |   |
| scaffold 6  | 7266 | 7271 | 1   | 353 | 76   | 407 | 86   | 93  | 24 | 2 | 27 | 1381 | 0E+00  | NANOZOOG7252 | +            |   |
| scaffold 6  | 7271 | 7266 | 76  | 407 | 1    | 353 | 86   | 81  | 24 | 2 | 27 | 1405 | 0E+00  | NANOZOOG7257 | -            |   |
| scaffold 6  | 7312 | 7313 | 2   | 461 | 1837 | 1   | 1371 | 100 | 74 | 0 | 2  | 6    | 7255   | 0E+00        | NANOZOOG7298 | - |
| scaffold 6  | 7313 | 7312 | 1   | 257 | 196  | 452 | 100  | 97  | 0  | 0 | 0  | 1350 | 2E-174 | NANOZOOG7299 | +            |   |
| contig 5    | 4606 | 4608 | 56  | 519 | 67   | 530 | 99   | 89  | 6  | 0 | 0  | 2485 | 0E+00  | NANOZOOG4596 | +            |   |
| contig 5    | 4608 | 4606 | 67  | 530 | 56   | 519 | 99   | 88  | 6  | 0 | 0  | 2485 | 0E+00  | NANOZOOG4597 | -            |   |
| contig 28   | 1276 | 1280 | 1   | 590 | 1    | 595 | 80   | 96  | 71 | 7 | 55 | 2390 | 0E+00  | NANOZOOG1276 | -            |   |
| contig 28   | 1280 | 1276 | 1   | 595 | 1    | 590 | 80   | 95  | 71 | 8 | 51 | 2317 | 0E+00  | NANOZOOG1280 | +            |   |
| scaffold 6  | 7498 | 7497 | 1   | 399 | 1    | 355 | 89   | 78  | 0  | 1 | 44 | 1870 | 0E+00  | NANOZOOG7483 | +            |   |
| scaffold 6  | 7497 | 7498 | 1   | 355 | 1    | 399 | 89   | 100 | 0  | 1 | 44 | 1870 | 0E+00  | NANOZOOG7482 | -            |   |

**Supplementary Table S13.** Alignment statistics of the duplicated genes identified in the *Rhodotorula babjevae* DBVPG 8058 genome by BLASTp

| Contig/<br>scaffold | Query | Subject | Query<br>start | Query<br>stop | Subject<br>start | Subject<br>stop | %<br>identity | %<br>coverage | Mismatches | Gaps | Gap<br>Bases | Score | E-Value | Gene ID      | Sense |
|---------------------|-------|---------|----------------|---------------|------------------|-----------------|---------------|---------------|------------|------|--------------|-------|---------|--------------|-------|
| contig 1            | 7     | 8       | 1              | 215           | 65               | 279             | 100           | 73            | 0          | 0    | 0            | 1152  | 3E-161  | NANOZOOG8    | -     |
| contig 1            | 8     | 7       | 65             | 279           | 1                | 215             | 100           | 77            | 0          | 0    | 0            | 1152  | 3E-161  | NANOZOOG9    | +     |
| contig 40           | 1190  | 1191    | 117            | 447           | 1                | 333             | 99            | 74            | 0          | 1    | 2            | 1702  | 0E+00   | NANOZOOG1189 | +     |
| contig 40           | 1191  | 1190    | 1              | 333           | 117              | 447             | 99            | 99            | 0          | 1    | 2            | 1702  | 0E+00   | NANOZOOG1190 | -     |
| contig 42           | 1785  | 1823    | 21             | 253           | 1                | 254             | 86            | 84            | 6          | 2    | 29           | 901   | 2E-123  | NANOZOOG1782 | +     |
| contig 42           | 1823  | 1785    | 1              | 254           | 21               | 253             | 86            | 85            | 6          | 2    | 29           | 966   | 2E-133  | NANOZOOG1820 | +     |
| contig 45           | 2269  | 2270    | 1              | 341           | 74               | 414             | 98            | 80            | 8          | 0    | 0            | 1769  | 0E+00   | NANOZOOG2265 | +     |
| contig 45           | 2270  | 2269    | 74             | 414           | 1                | 341             | 98            | 82            | 8          | 0    | 0            | 1769  | 0E+00   | NANOZOOG2266 | -     |
| contig 47           | 2722  | 2726    | 17             | 419           | 1                | 395             | 88            | 90            | 25         | 4    | 24           | 1764  | 0E+00   | NANOZOOG2714 | -     |
| contig 47           | 2726  | 2722    | 1              | 395           | 17               | 419             | 87            | 98            | 30         | 4    | 24           | 1687  | 0E+00   | NANOZOOG2718 | +     |
| contig 48           | 2853  | 2854    | 137            | 580           | 1                | 444             | 100           | 77            | 0          | 0    | 0            | 2285  | 0E+00   | NANOZOOG2845 | +     |
| contig 48           | 2854  | 2853    | 1              | 444           | 137              | 580             | 100           | 100           | 0          | 0    | 0            | 2285  | 0E+00   | NANOZOOG2846 | -     |
| contig 51           | 3245  | 3246    | 1              | 187           | 36               | 222             | 100           | 94            | 0          | 0    | 0            | 932   | 3E-130  | NANOZOOG3236 | -     |
| contig 51           | 3246  | 3245    | 36             | 222           | 1                | 187             | 100           | 84            | 0          | 0    | 0            | 932   | 4E-130  | NANOZOOG3237 | +     |
| contig 51           | 3354  | 3355    | 98             | 459           | 1                | 359             | 99            | 76            | 1          | 2    | 3            | 1900  | 0E+00   | NANOZOOG3345 | +     |
| contig 51           | 3355  | 3354    | 1              | 359           | 98               | 459             | 99            | 100           | 1          | 2    | 3            | 1900  | 0E+00   | NANOZOOG3346 | -     |
| contig 51           | 3393  | 3394    | 1              | 233           | 37               | 269             | 100           | 93            | 1          | 0    | 0            | 1221  | 1E-172  | NANOZOOG3384 | +     |
| contig 51           | 3394  | 3393    | 37             | 269           | 1                | 233             | 100           | 87            | 1          | 0    | 0            | 1221  | 1E-172  | NANOZOOG3385 | -     |
| contig 53           | 3517  | 7028    | 1              | 224           | 29               | 252             | 98            | 100           | 5          | 0    | 0            | 1118  | 1E-157  | NANOZOOG3508 | -     |
| contig 86           | 7028  | 3517    | 29             | 252           | 1                | 224             | 98            | 89            | 5          | 0    | 0            | 1118  | 1E-157  | NANOZOOG6994 | -     |
| contig 53           | 3695  | 3696    | 1              | 173           | 37               | 209             | 100           | 97            | 0          | 0    | 0            | 910   | 2E-127  | NANOZOOG3686 | +     |
| contig 53           | 3696  | 3695    | 37             | 209           | 1                | 173             | 100           | 83            | 0          | 0    | 0            | 910   | 2E-127  | NANOZOOG3687 | -     |
| contig 54           | 3739  | 3743    | 1              | 439           | 1                | 364             | 75            | 82            | 34         | 4    | 75           | 1598  | 0E+00   | NANOZOOG3730 | +     |
| contig 54           | 3743  | 3739    | 1              | 361           | 1                | 436             | 75            | 99            | 36         | 4    | 75           | 1486  | 0E+00   | NANOZOOG3734 | -     |
| contig 69           | 4979  | 4980    | 1              | 620           | 51               | 670             | 100           | 93            | 1          | 0    | 0            | 3319  | 0E+00   | NANOZOOG4967 | +     |
| contig 69           | 4980  | 4979    | 51             | 670           | 1                | 620             | 100           | 93            | 1          | 0    | 0            | 3319  | 0E+00   | NANOZOOG4968 | -     |
| contig 69           | 5060  | 5062    | 204            | 999           | 2                | 956             | 76            | 80            | 69         | 9    | 159          | 3159  | 0E+00   | NANOZOOG5048 | +     |
| contig 69           | 5062  | 5060    | 2              | 956           | 204              | 999             | 76            | 83            | 69         | 9    | 159          | 3148  | 0E+00   | NANOZOOG5049 | -     |
| contig 70           | 5308  | 6580    | 5              | 159           | 1                | 156             | 84            | 96            | 20         | 2    | 5            | 615   | 1E-83   | NANOZOOG5294 | -     |
| contig 82           | 6580  | 5308    | 1              | 156           | 5                | 159             | 84            | 97            | 21         | 2    | 5            | 597   | 7E-81   | NANOZOOG6562 | +     |
| contig 71           | 5441  | 5451    | 1              | 475           | 1                | 475             | 87            | 83            | 62         | 0    | 0            | 2050  | 0E+00   | NANOZOOG5427 | -     |
| contig 71           | 5451  | 5441    | 1              | 475           | 1                | 475             | 87            | 100           | 62         | 0    | 0            | 2113  | 0E+00   | NANOZOOG5437 | +     |
| contig 73           | 5763  | 5786    | 77             | 786           | 1                | 709             | 89            | 84            | 31         | 3    | 47           | 3375  | 0E+00   | NANOZOOG5747 | +     |
| contig 73           | 5786  | 5763    | 1              | 709           | 77               | 786             | 89            | 97            | 31         | 3    | 47           | 3376  | 0E+00   | NANOZOOG5770 | +     |
| contig 75           | 6248  | 6249    | 7              | 379           | 1                | 363             | 97            | 93            | 0          | 1    | 10           | 1907  | 0E+00   | NANOZOOG6230 | -     |
| contig 75           | 6249  | 6248    | 1              | 363           | 7                | 379             | 97            | 100           | 0          | 1    | 10           | 1907  | 0E+00   | NANOZOOG6231 | +     |
| contig 77           | 6501  | 6510    | 1              | 750           | 1                | 703             | 91            | 94            | 18         | 2    | 47           | 3469  | 0E+00   | NANOZOOG6483 | -     |
| contig 77           | 6510  | 6501    | 1              | 703           | 1                | 750             | 91            | 100           | 18         | 2    | 47           | 3469  | 0E+00   | NANOZOOG6492 | +     |
| scaffold<br>52      | 7488  | 7489    | 80             | 443           | 1                | 368             | 99            | 81            | 0          | 2    | 4            | 1911  | 0E+00   | NANOZOOG7454 | +     |
| scaffold<br>52      | 7489  | 7488    | 1              | 368           | 80               | 443             | 99            | 99            | 0          | 2    | 4            | 1911  | 0E+00   | NANOZOOG7455 | -     |
| scaffold<br>52      | 7497  | 7498    | 1              | 501           | 10               | 515             | 99            | 100           | 0          | 1    | 5            | 2509  | 0E+00   | NANOZOOG7463 | -     |
| scaffold<br>52      | 7498  | 7497    | 10             | 515           | 1                | 501             | 99            | 97            | 0          | 1    | 5            | 2509  | 0E+00   | NANOZOOG7464 | +     |

**Supplementary Table S14.** Duplicated genes in *Rhodotorula babjevae* identified by

BLASTp and OrthoVenn2 with a minimum coverage of 70%

| Genetic structure            | CBS 7808  | Functional prediction                                                                  | DBVPG 8058 | Functional prediction                                               |
|------------------------------|-----------|----------------------------------------------------------------------------------------|------------|---------------------------------------------------------------------|
| <b>Putative chromosome 1</b> | 4319/4337 | Protein bcp1                                                                           | 4979/4980  | Carbamoyl-phosphate synthase arginine-specific large chain          |
|                              | 4341/4342 | Ser/Arg repetitive matrix protein 2                                                    | 5060/5062  | Ser/Arg repetitive matrix protein 2 & Pantothenate transporter liz1 |
|                              | 4606/4608 | Phenylalanine--tRNA ligase alpha subunit & Probable feruloyl esterase B-2              | 7488/7489  | EF-1-alpha                                                          |
|                              | 4665      | Uncharacterized protein C17G8.02                                                       | 7497/7498  | Glycoprotein gp2                                                    |
|                              | 4799/4806 | Immediate-early protein 2 & Putative uncharacterized protein ENSP00000383309           |            |                                                                     |
|                              | 4904      | A-agglutinin anchorage subunit                                                         |            |                                                                     |
| <b>Putative chromosome 2</b> | 2814/2815 | Ser/Arg repetitive matrix protein 1                                                    | 699/700    | Quinone-oxidoreductase homolog, chloroplastic & MUC-5AC             |
|                              | 2854/2877 | Putative uncharacterized protein ENSP00000383309 & Ser/Arg repetitive matrix protein 3 | 881/918    | Histone H2A                                                         |
|                              | 3041/3043 | Heat shock 70 kDa protein & Heat shock protein SSC1, mitochondrial                     |            |                                                                     |
|                              | 5361/5364 | Protein arginine N-methyltransferase 1                                                 |            |                                                                     |
| <b>Putative chromosome 3</b> | 1409      | Ser/Arg repetitive matrix protein 1                                                    | 1575/1776* | Cytochrome P450 monooxygenase ALT8                                  |
|                              | 1471/1488 | Ser/Arg repetitive matrix protein 2 & Protein YIP5                                     | 1785/1823* | MUC-5AC & Pre-mRNA-splicing factor CWC22                            |
|                              | 1500/1501 | Putative protein TPRXL                                                                 | 2011/2024* | Ser/Arg repetitive matrix protein 2 & AtPERK9                       |
|                              | 1515/1516 | Ser/Arg repetitive matrix protein 2                                                    |            |                                                                     |
|                              | 1749/1763 | Protein SON & Pre-mRNA-splicing factor CWC21                                           |            |                                                                     |
|                              | 1851/1892 | RNA-binding protein with serine-rich domain 1 & ERF3                                   |            |                                                                     |
|                              | 1960      | Pneumococcal serine-rich repeat protein                                                |            |                                                                     |
| <b>Putative chromosome 4</b> |           |                                                                                        | 6248/6249  | IE2                                                                 |
| <b>Putative chromosome 5</b> | 5765/5781 | Ser/Arg repetitive matrix protein 2 & Ser/Arg repetitive matrix protein 1              | 2853/2854  | Heat shock protein 60, mitochondrial                                |
|                              | 5915      | Uncharacterized protein C17G8.02                                                       | 3517       | Uncharacterized serine-rich protein C215.13                         |
|                              | 5929/5930 | Heat shock protein 60, mitochondrial                                                   | 3695/3696  | 40S ribosomal protein S1                                            |
| <b>Putative chromosome 6</b> | 701       | Alpha-ketoglutarate-dependent sulfonate dioxygenase                                    | 1575/1776* | Cytochrome P450 monooxygenase ALT8                                  |
|                              |           |                                                                                        | 1785/1823* | MUC-5AC & Pre-mRNA-splicing factor CWC22                            |
|                              |           |                                                                                        | 2011/2024* | Ser/Arg repetitive matrix protein 2 & AtPERK9                       |
|                              |           |                                                                                        | 6681/6687  | Endochitinase 2 & Glycoprotein gp2                                  |
|                              | 7144/7145 | Tryptophan synthase                                                                    | 5308/5318  | Histone H3.2                                                        |

|                               |           |                                                                                               |            |                                                |
|-------------------------------|-----------|-----------------------------------------------------------------------------------------------|------------|------------------------------------------------|
| <b>Putative chromosome 7</b>  | 7266/7271 | Mannose-6-phosphate isomerase                                                                 |            |                                                |
|                               | 7286/7301 | Histone H3.2                                                                                  |            |                                                |
|                               | 7312/7313 | Acetyl-CoA carboxylase                                                                        |            |                                                |
|                               | 7498/7497 | Sulfite reductase [NADPH] hemoprotein beta-component & Sulfite reductase [NADPH] subunit beta |            |                                                |
| <b>Putative chromosome 8</b>  | 6916      | Chitin deacetylase 1                                                                          | 1190/1191  | AtLRX3                                         |
|                               | 6968/6969 | 60S ribosomal protein L3                                                                      |            |                                                |
| <b>Putative chromosome 9</b>  | 24/38     | Ser/Arg repetitive matrix protein 2 & Vitellogenin-1                                          | 2581/2590  | Ser/Arg repetitive matrix protein 2            |
|                               | 84        | Alpha-ketoglutarate-dependent dioxygenase cnsM                                                | 2601/2627  | MUC-5AC                                        |
|                               | 122/123   | MUC-5AC & Ser/Arg-rich splicing factor SR45                                                   | 2722/2726  | Ser/Arg repetitive matrix protein 1            |
|                               | 326/327   | Ser/Arg repetitive matrix protein 2 & Ser/Arg repetitive matrix protein 1                     | 3739/3743* | Trimethylguanosine synthase                    |
| <b>Putative chromosome 10</b> | 2615/2616 | Ser/Arg repetitive matrix protein 1                                                           |            |                                                |
| <b>Putative chromosome 11</b> | 2140/2163 | MUC-5AC & AtOPT4                                                                              | 5763/5786  | AtOPT4                                         |
|                               | 2182      | Ser/Arg repetitive matrix protein 1                                                           | 6580       | Histone H3                                     |
| <b>Putative chromosome 12</b> | 6541/6542 | Fumarate hydratase, mitochondrial                                                             | 3245/3246  | Splicing factor YJU2 & Protamine               |
|                               |           |                                                                                               | 3354/3355  | Actin                                          |
|                               |           |                                                                                               | 3393/3394  | Fumarate hydratase, mitochondrial              |
| <b>Putative chromosome 13</b> | 801/812   | Ser/Arg repetitive matrix protein 2                                                           | 5441/5451  | Ser/Arg repetitive matrix protein 2            |
|                               | 830/831   | Phosphoenolpyruvate carboxykinase (ATP)                                                       |            |                                                |
|                               | 2717/2727 | Ser/Arg repetitive matrix protein 2 & Putative protein TPRXL                                  |            |                                                |
| <b>Putative chromosome 14</b> | 4016/4020 | Trimethylguanosine synthase                                                                   | 6501/6510  | Putative GPI-anchored protein pfl2             |
|                               | 4044/4049 | Branched chain 2-oxo-acid dehydrogenase complex component E2                                  | 3739/3743* | Trimethylguanosine synthase                    |
| <b>Putative chromosome 17</b> | 3191/3192 | Ser/Arg repetitive matrix protein 1                                                           | 07/08      | Aspartate aminotransferase, mitochondrial      |
|                               | 3207/3228 | MUC-5AC & Uncharacterized serine-rich protein                                                 |            |                                                |
|                               | 3262/3263 | Probable aldo-keto reductase 2 & Aldo-keto reductase yakc                                     |            |                                                |
| <b>Putative chromosome 18</b> |           |                                                                                               | 7028       | Bromodomain and WD repeat-containing protein 3 |
| <b>Putative chromosome 19</b> | 1276/1280 | Probable quinate permease                                                                     |            |                                                |
| <b>Putative chromosome 20</b> |           |                                                                                               | 2269/2270  | TCP-1-zeta                                     |
| <b>Putative chromosome 21</b> | 5744      | Pneumococcal serine-rich repeat protein                                                       |            |                                                |

\* Paralogous sequences from DBVPG 8058 that are located in chromosomes containing large translocations compared to CBS 7808. The paralogous sequences with orthologs in the same putative chromosome from the other *R. babjevae* strain are indicated in black.

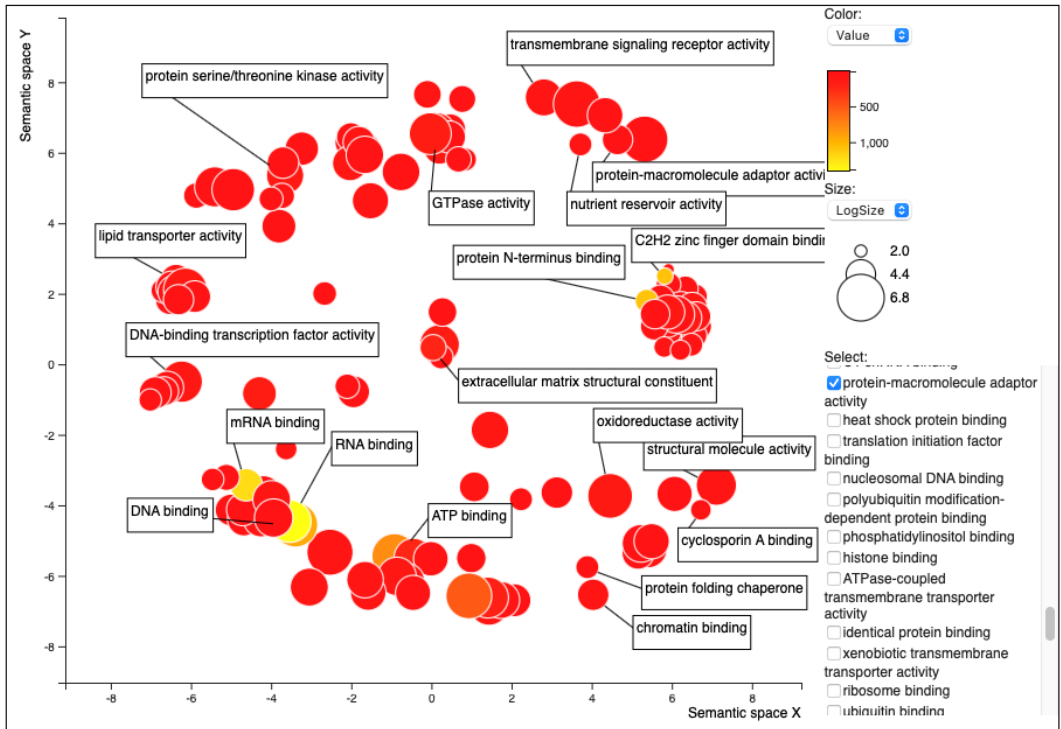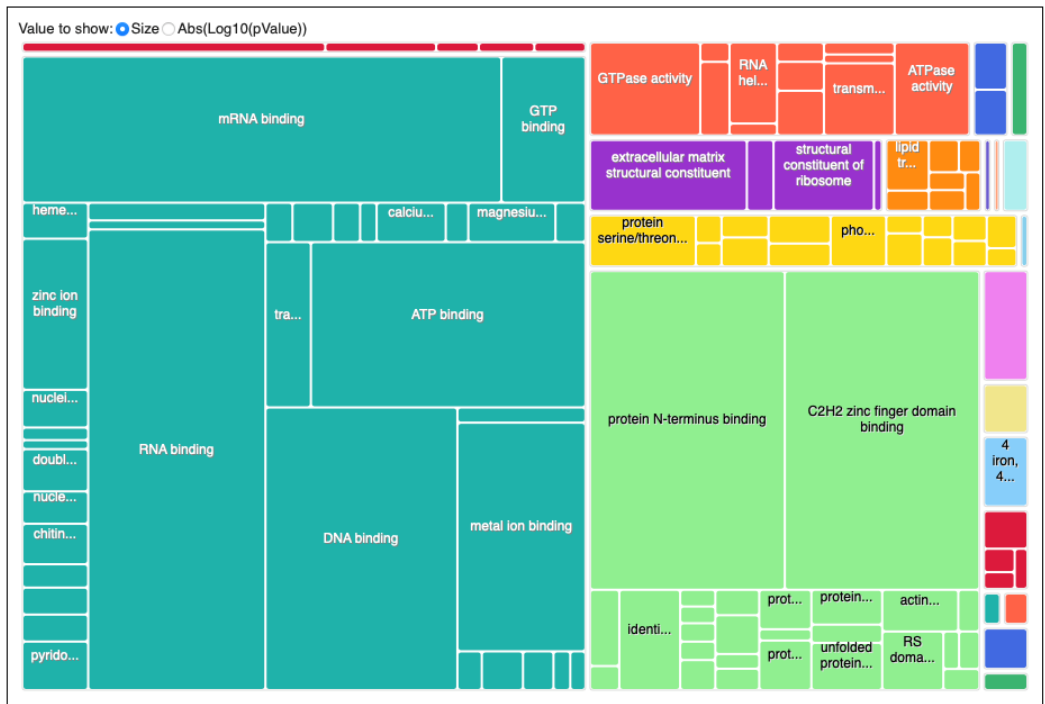

(a)



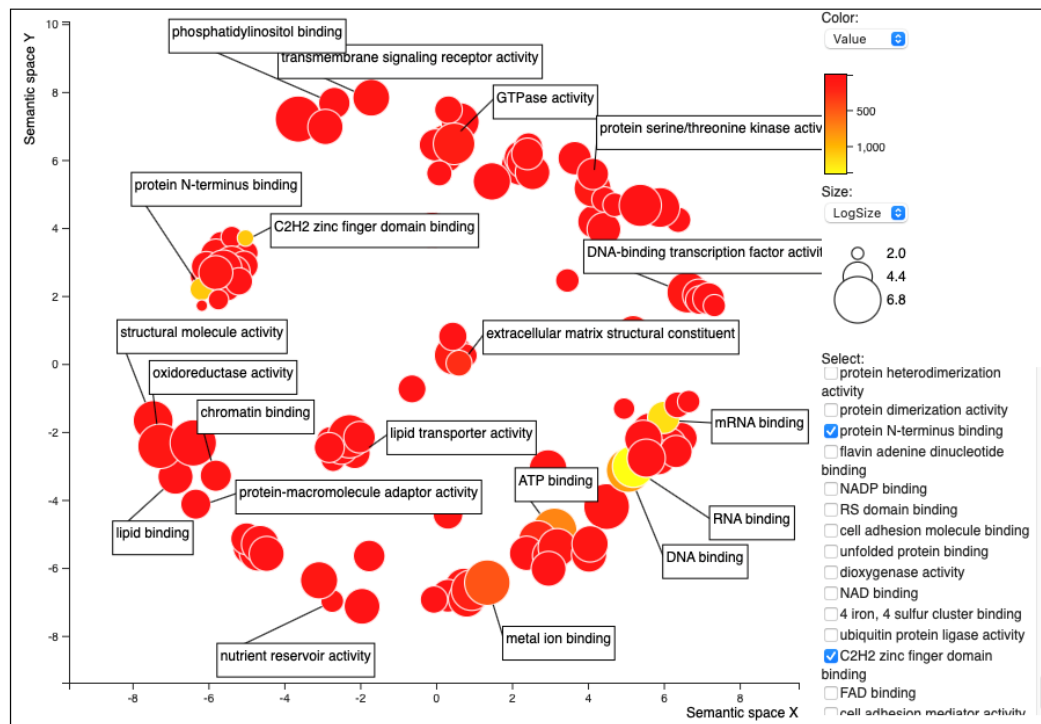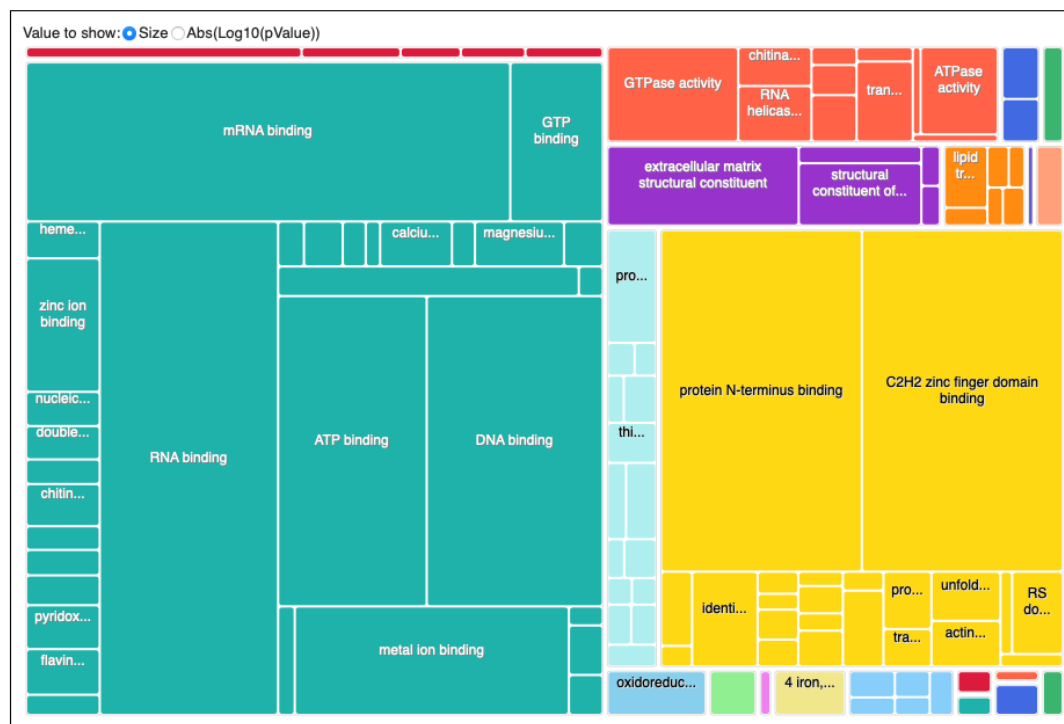

(b)

**Supplementary Figure S1.** Gene Ontology (GO) term summary related to the GO topic: molecular functions. (a) *Rhodotorula babjevae* CBS 7808; (b) *R. babjevae* DBVPG 8058.





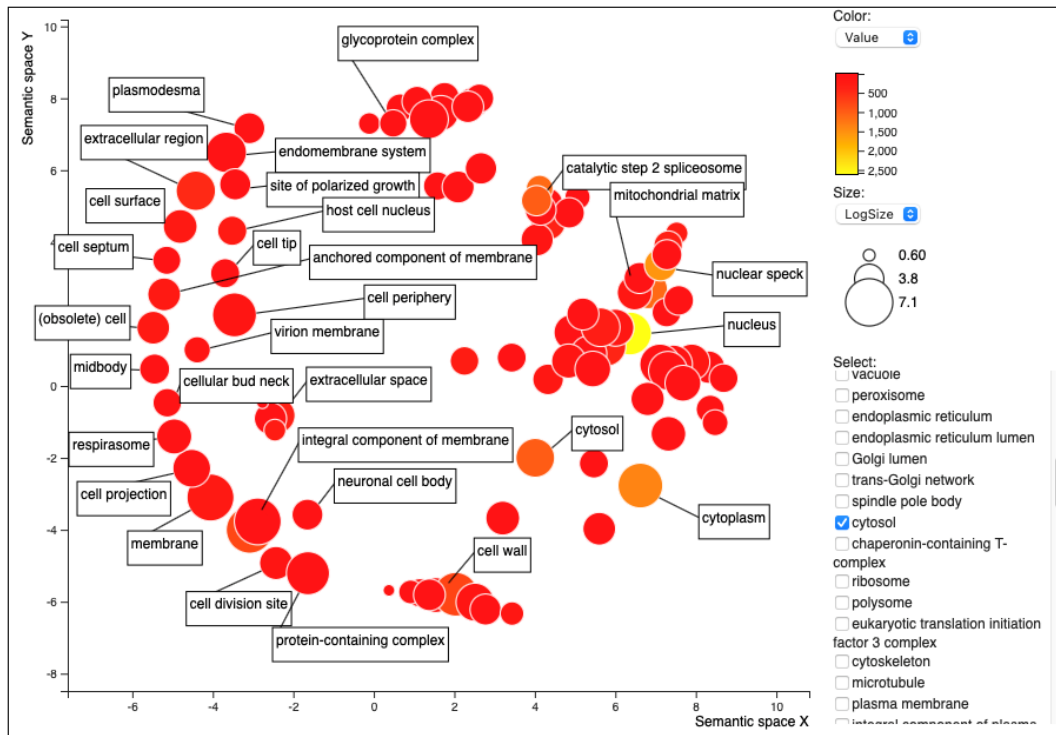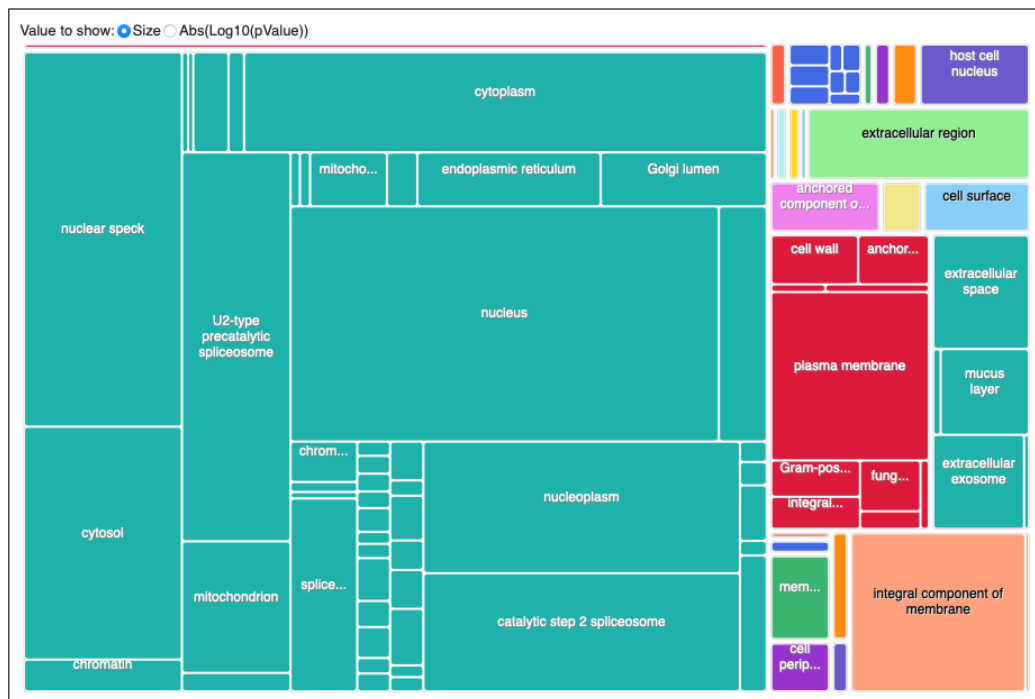

(a)

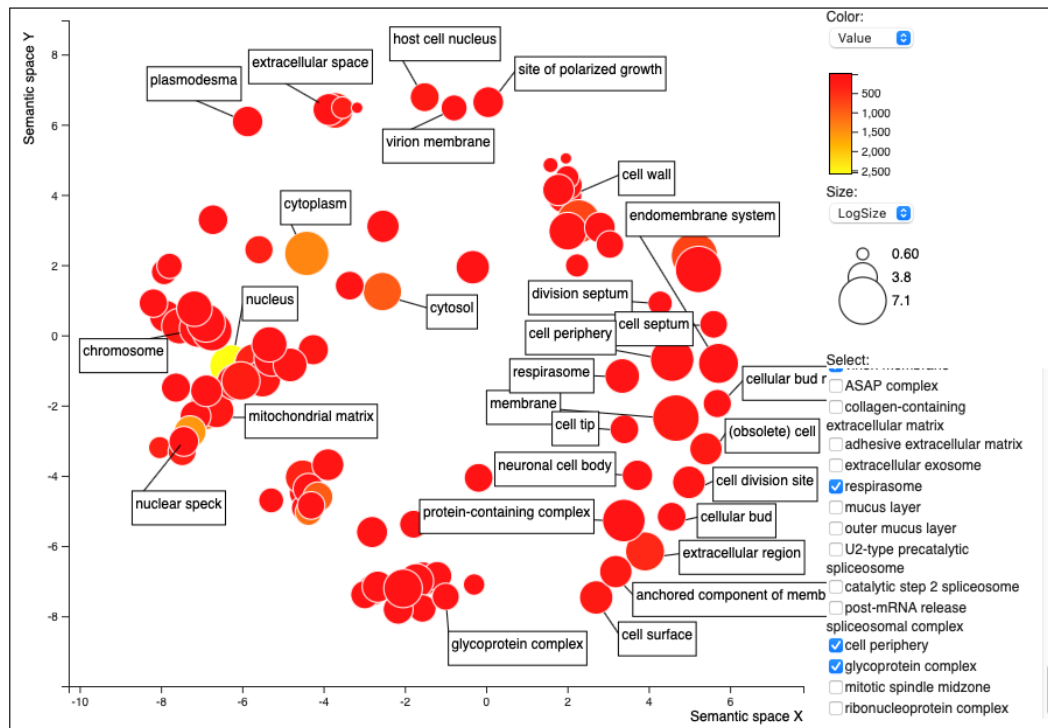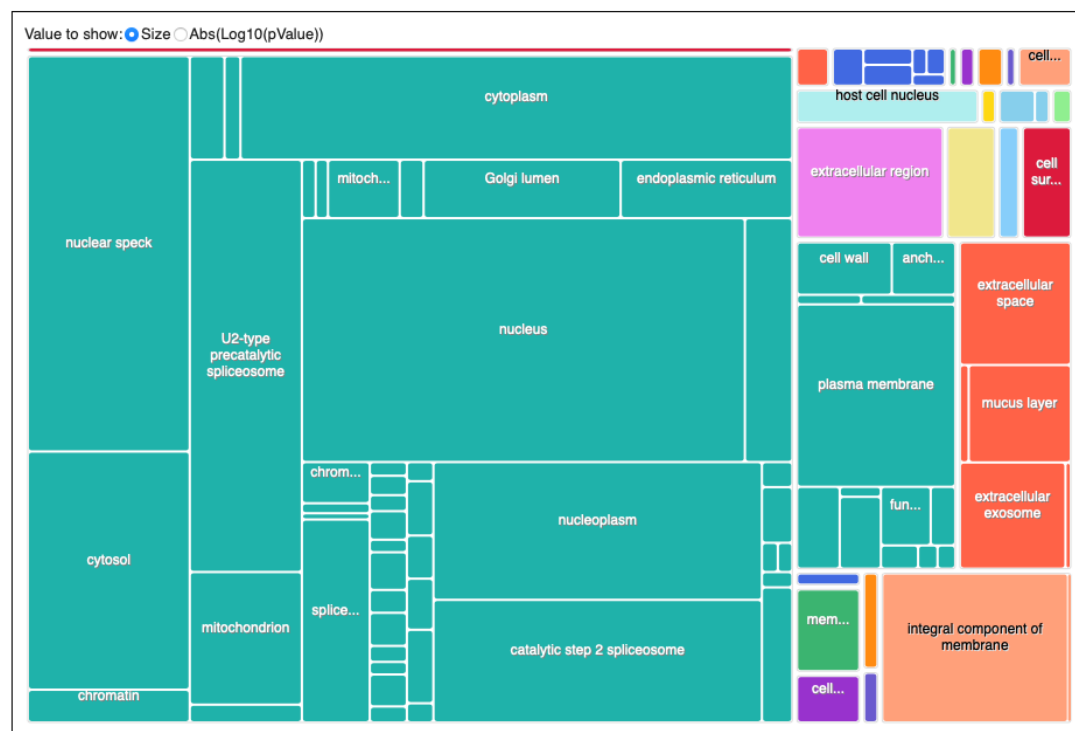

(b)

**Supplementary Figure S3.** Gene Ontology (GO) term summaries belonging to the GO topic: cellular components. (a) *Rhodotorula babjevae* CBS 7808; (b) *R. babjevae* DBVPG 8058.

## FATTY ACID METABOLISM

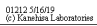

(a)

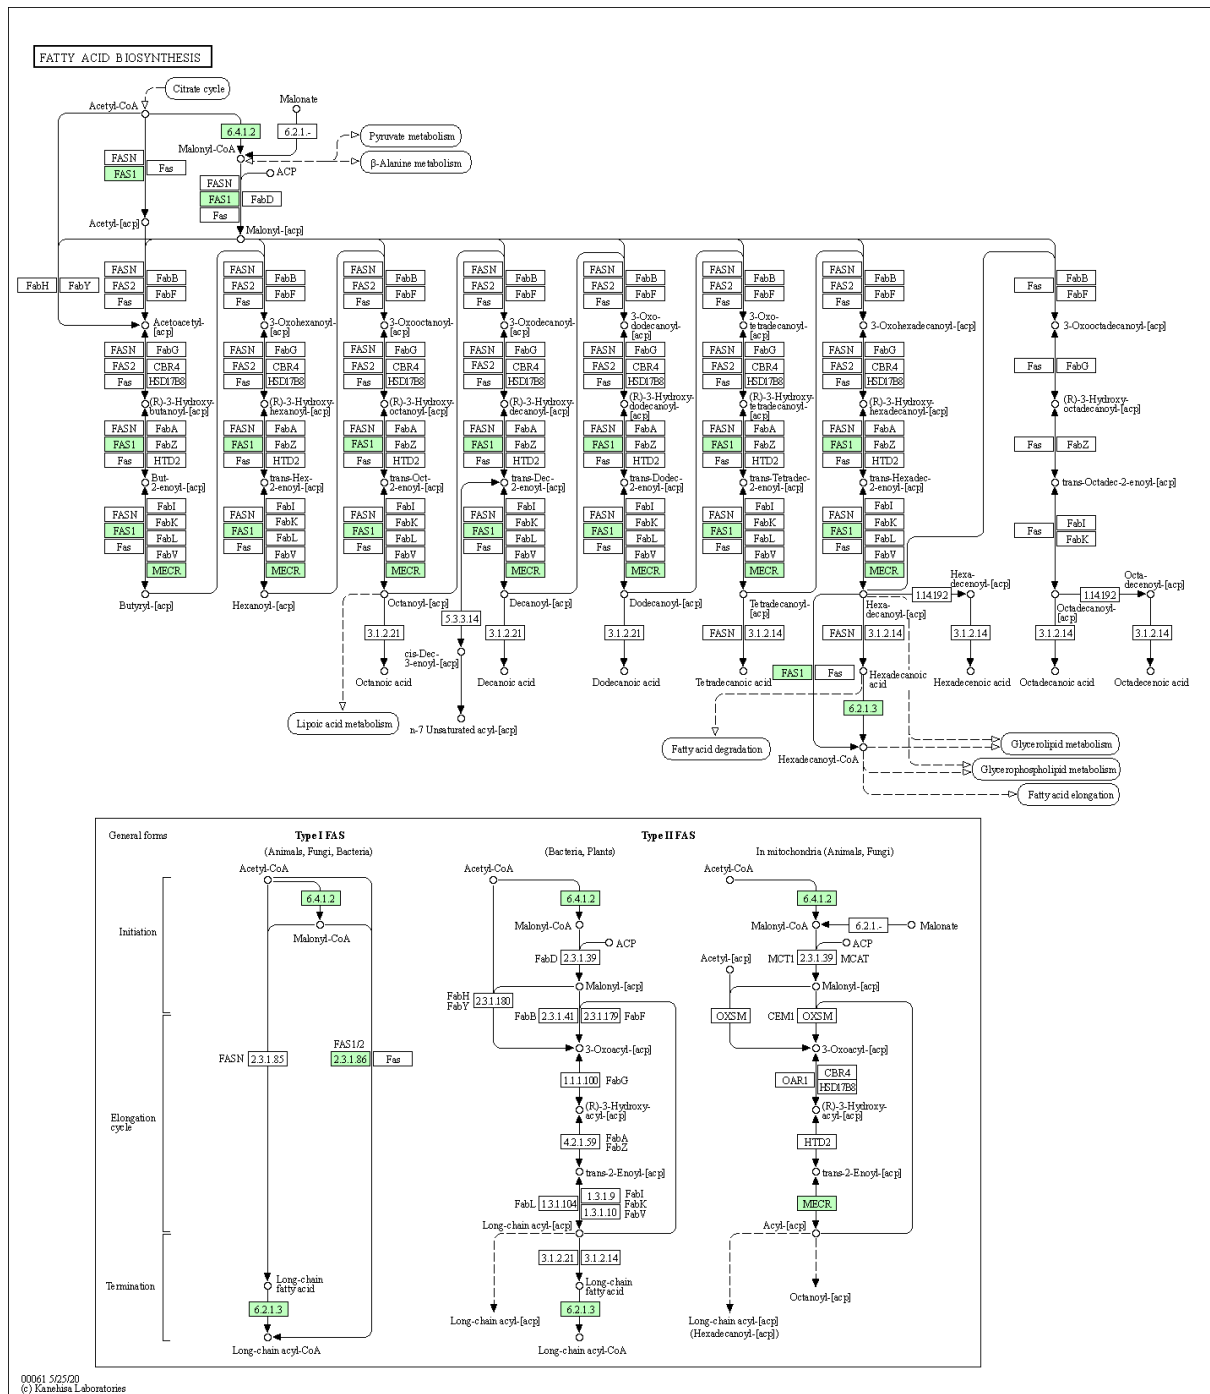

(b)

|   |   |   |   |
|---|---|---|---|
| 0 | 1 | 2 | 3 |
|---|---|---|---|

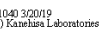

(c)





# TERPENOID BACKBONE BIOSYNTHESIS

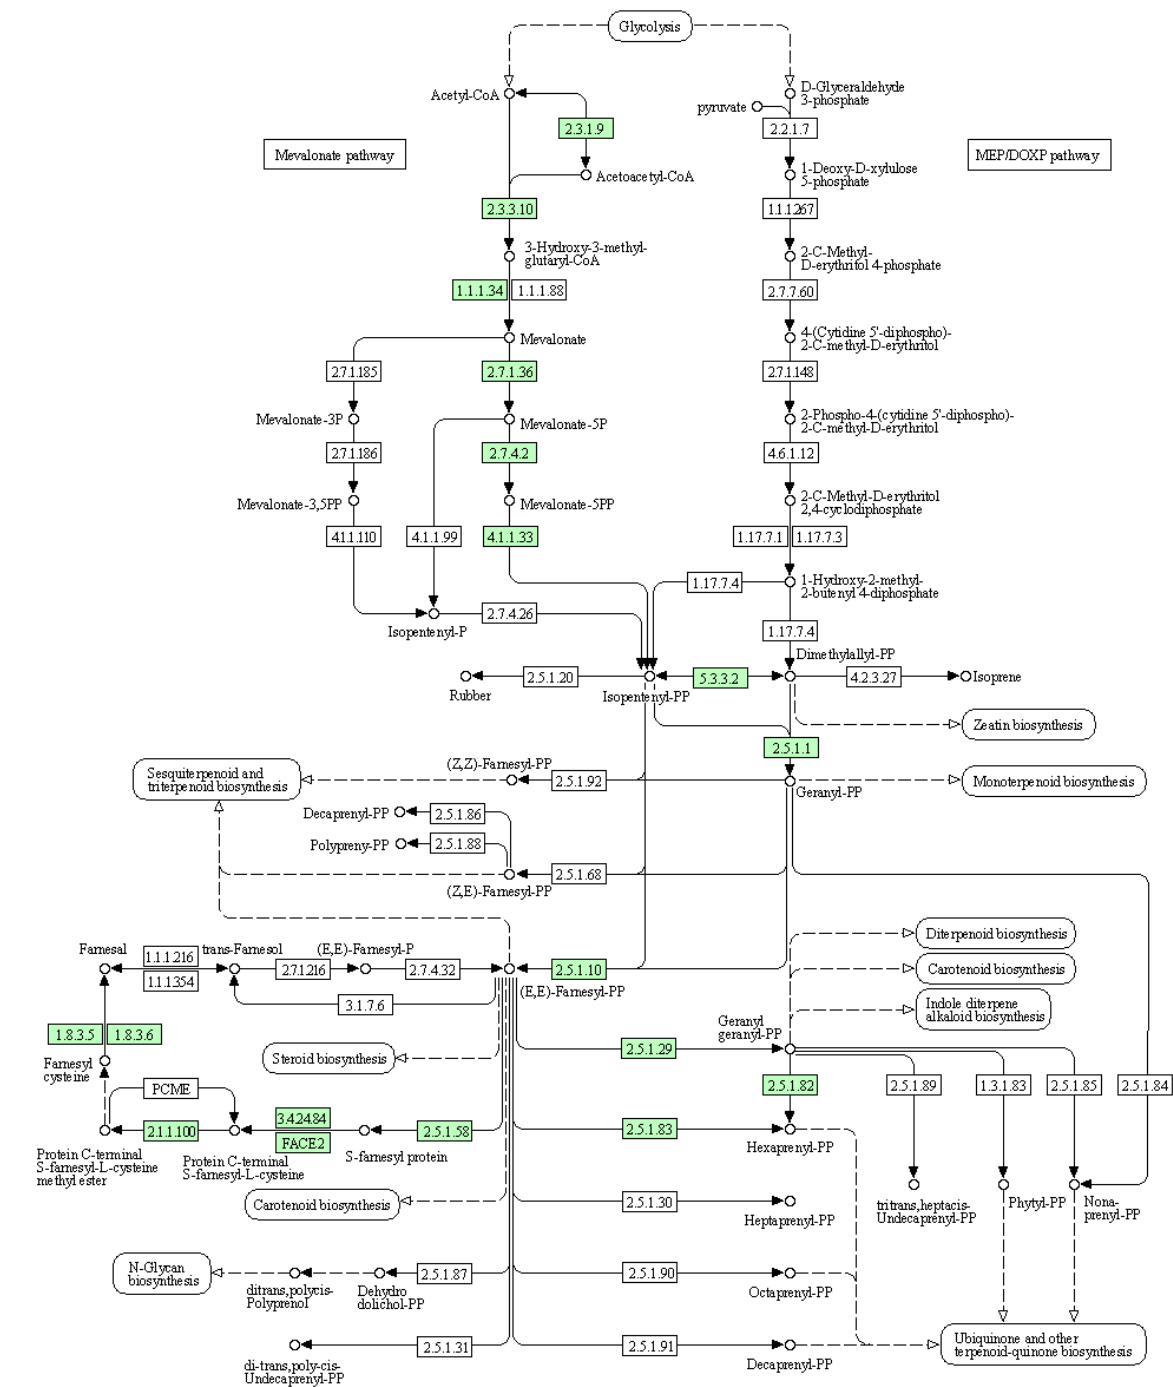

00900 3/27/19  
(c) Kanehisa Laboratories

(e)

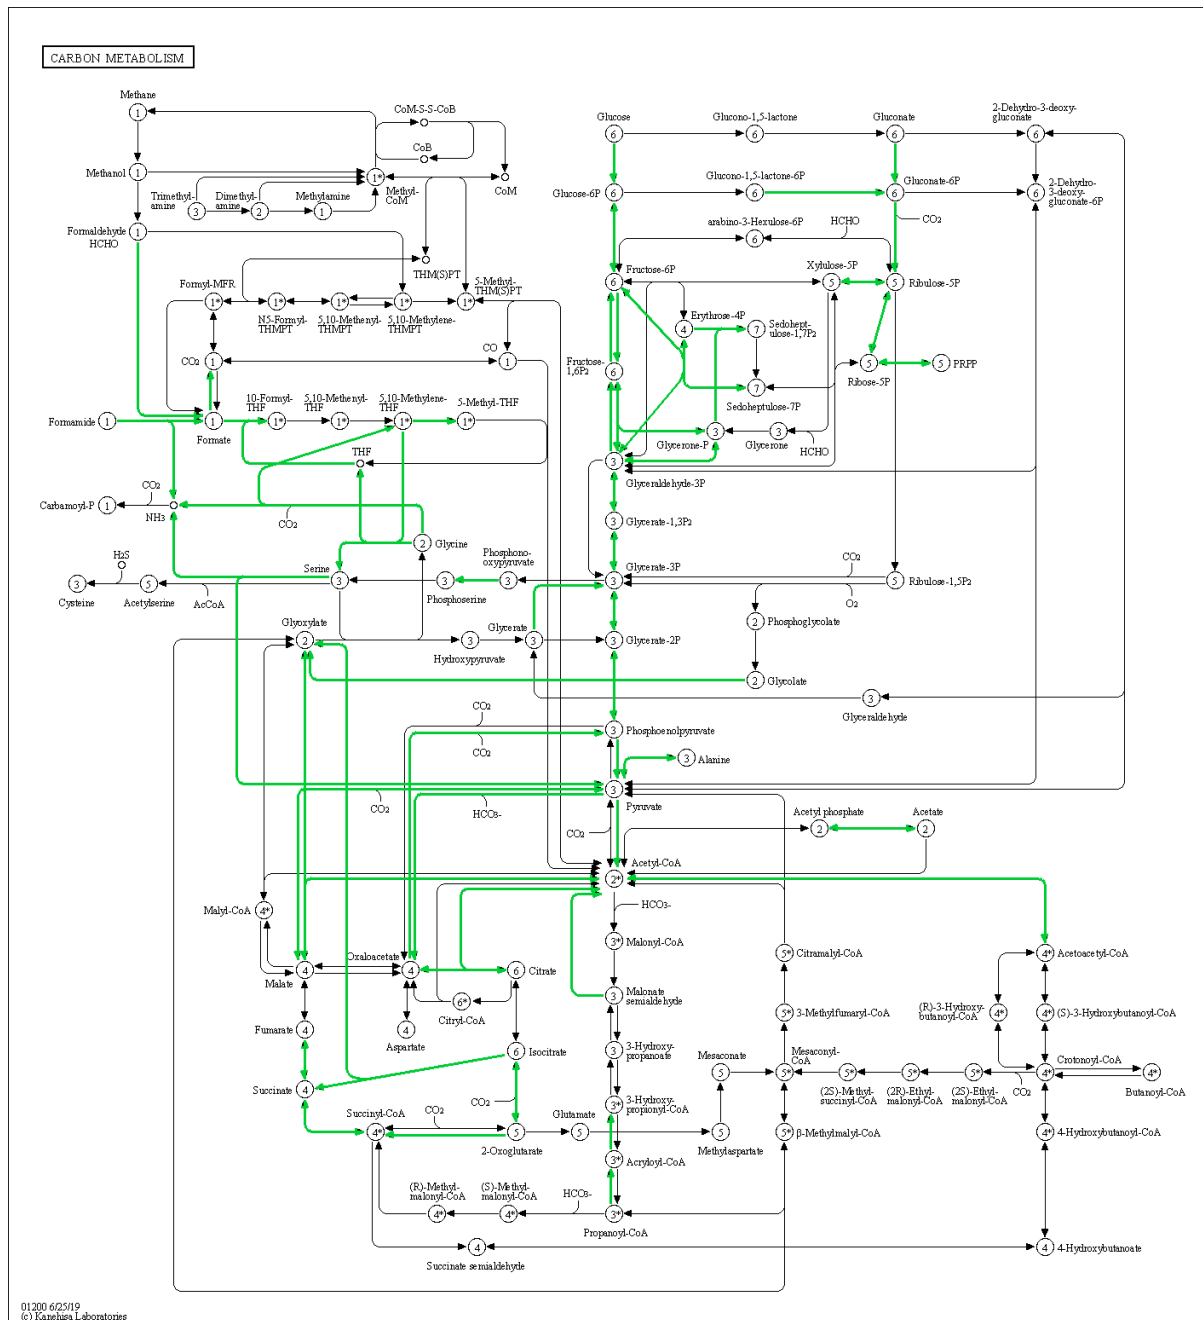

(f)

**Supplementary Figure S4.** Examples of lipid metabolism pathways in *Rhodotorula babjevae* CBS 7808 reconstructed by KEGG Mapper. The annotated transcripts with affiliated KEGG Orthology (KO) identifiers involved in each metabolic pathway are colored in green. (a) Fatty acid metabolism pathways; (b) biosynthesis of fatty acids; (c) biosynthesis of unsaturated fatty acids; (d) glycerolipid metabolism; (e) terpenoid backbone biosynthesis; (f) Carbon metabolism.

## in mitochondria

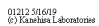

(a)

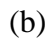

# BIOSYNTHESIS OF UNSATURATED FATTY ACIDS

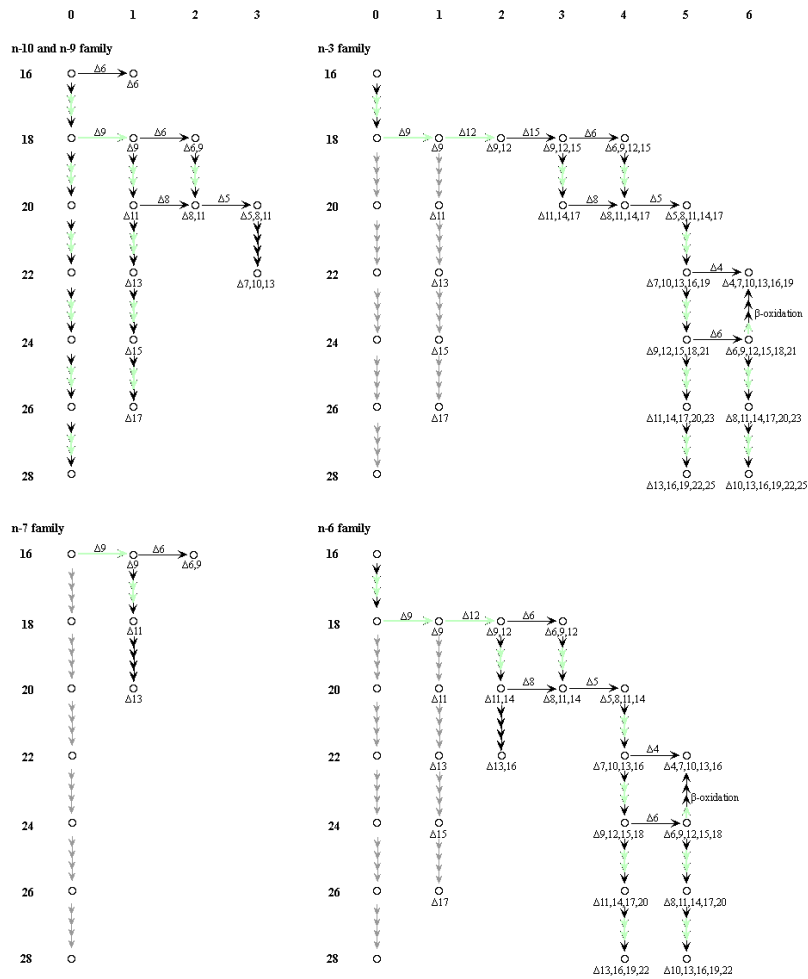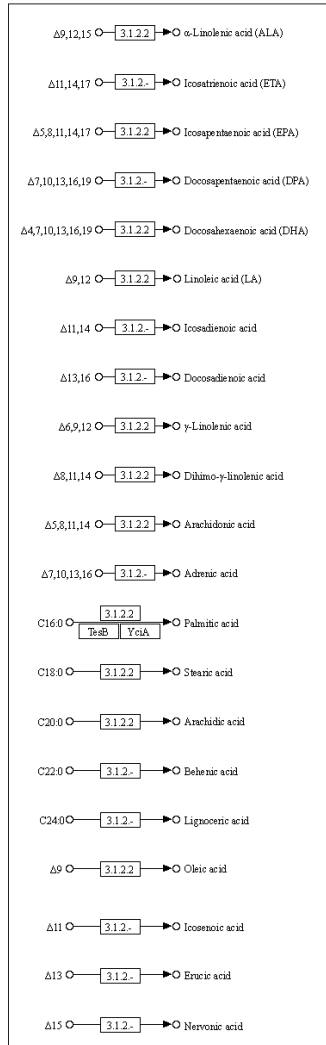

01040 3/20/19  
(c) Kanehisa Laboratories

(c)



# TERPENOID BACKBONE BIOSYNTHESIS



00900 3/27/19  
(c) Kanehisa Laboratories

(e)



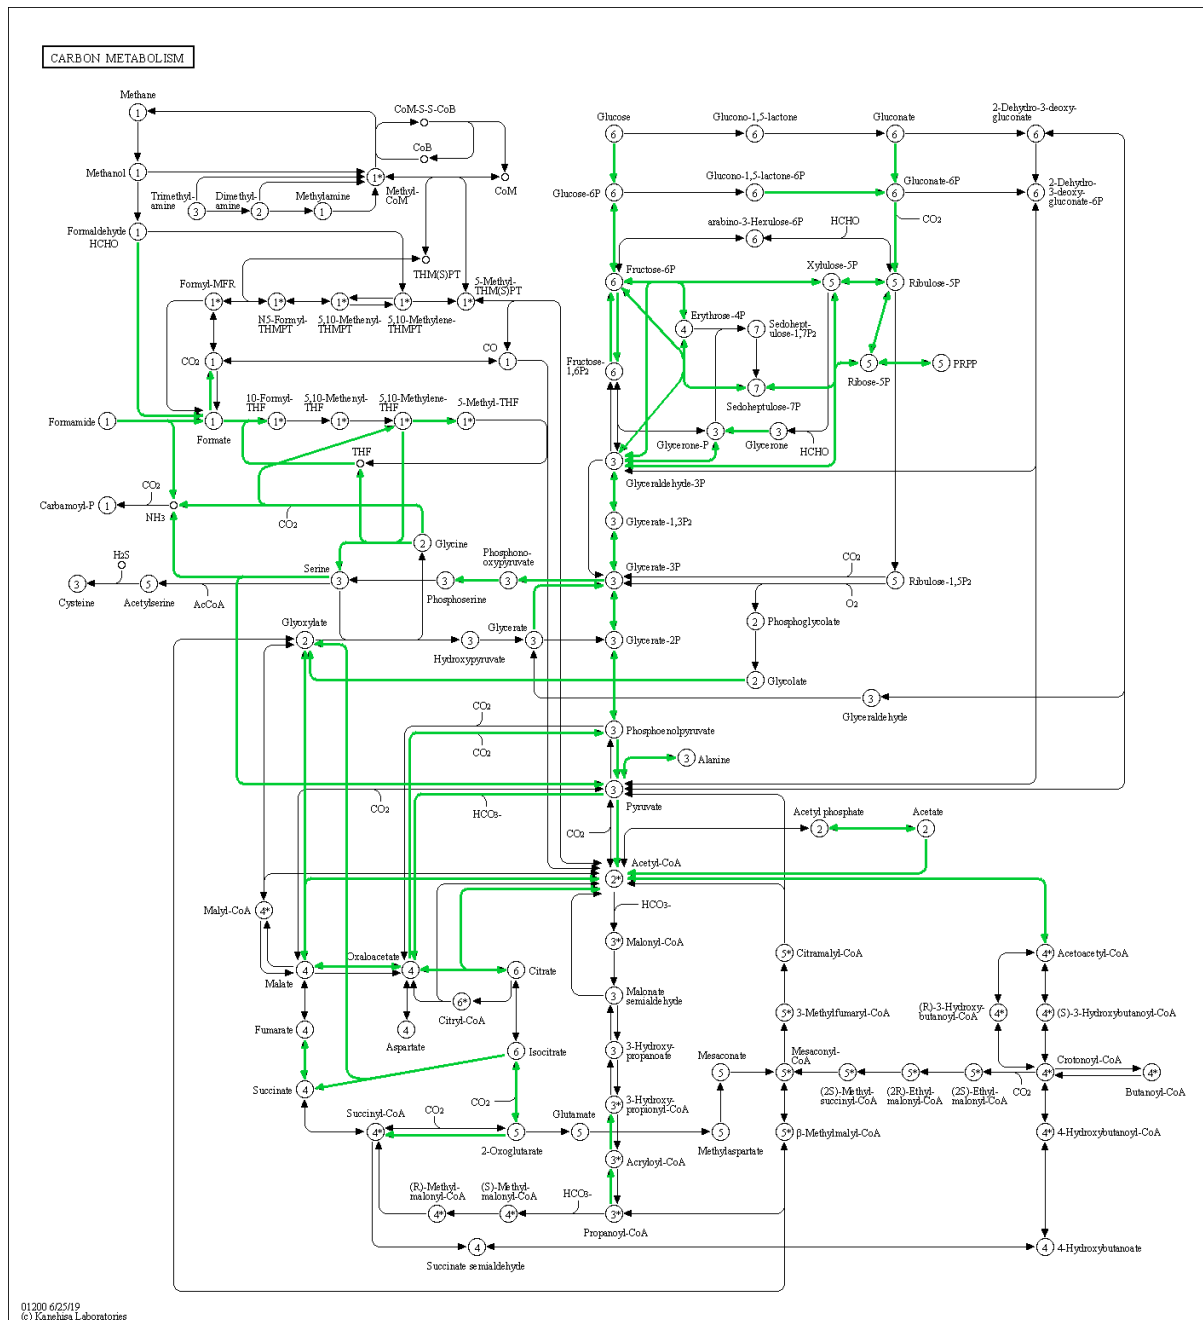

(f)

**Supplementary Figure S5. Examples of lipid metabolism pathways in *Rhodotorula babjevae***

DBVPG 8058 reconstructed by KEGG Mapper. The annotated transcripts with affiliated KEGG Orthology (KO) identifiers involved in each metabolic pathway are colored in green.

(a) Fatty acid metabolism pathways; (b) biosynthesis of fatty acids; (c) biosynthesis of unsaturated fatty acids; (d) glycerolipid metabolism; (e) terpenoid backbone biosynthesis; (f) Carbon metabolism.

## BUSCO Assessment Results

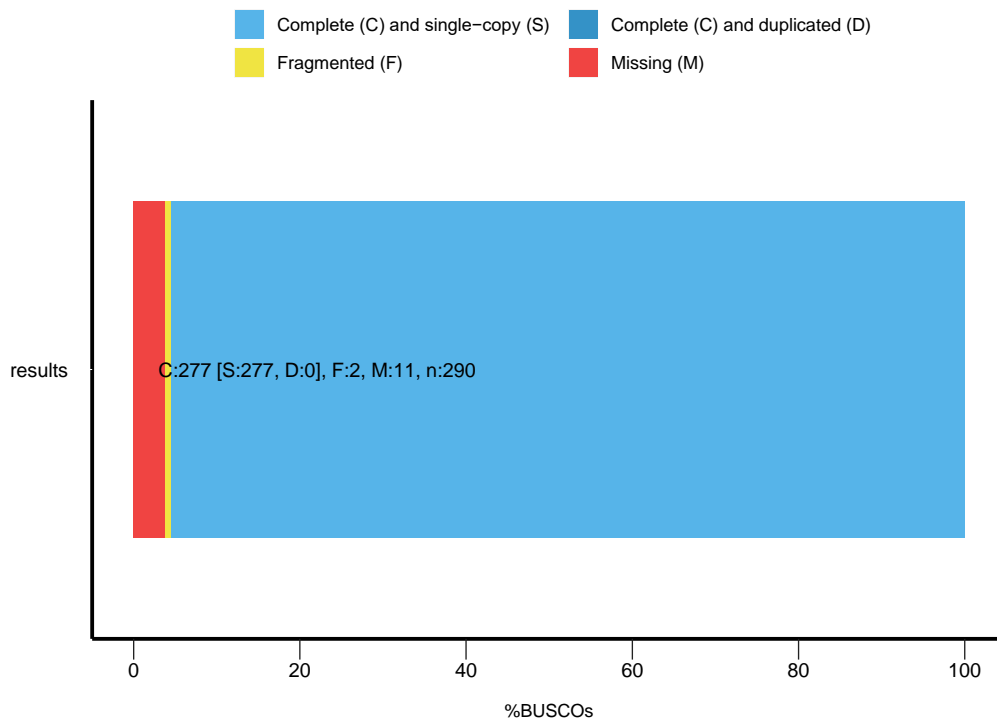

(a)

## BUSCO Assessment Results

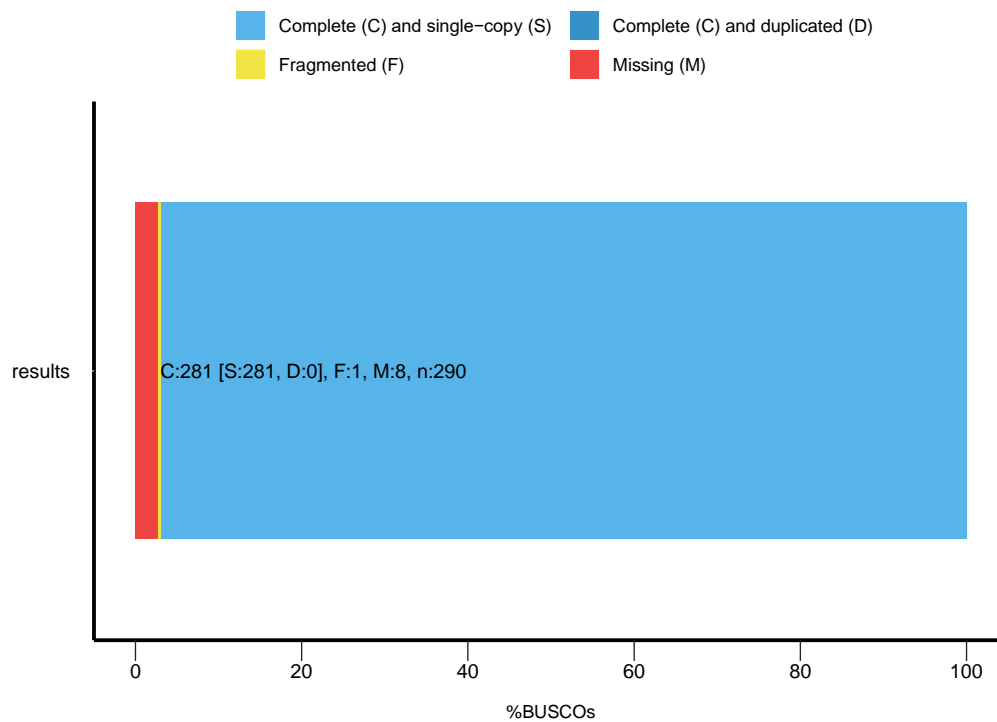

(b)

**Supplementary Figure S6.** Quantitative assessment of the hybrid genome assemblies and annotation completeness using Benchmarking Universal Single-Copy Orthologs (BUSCO). (a) *Rhodotorula babjevae* CBS 7808; (b) *R. babjevae* DBVPG 8058.

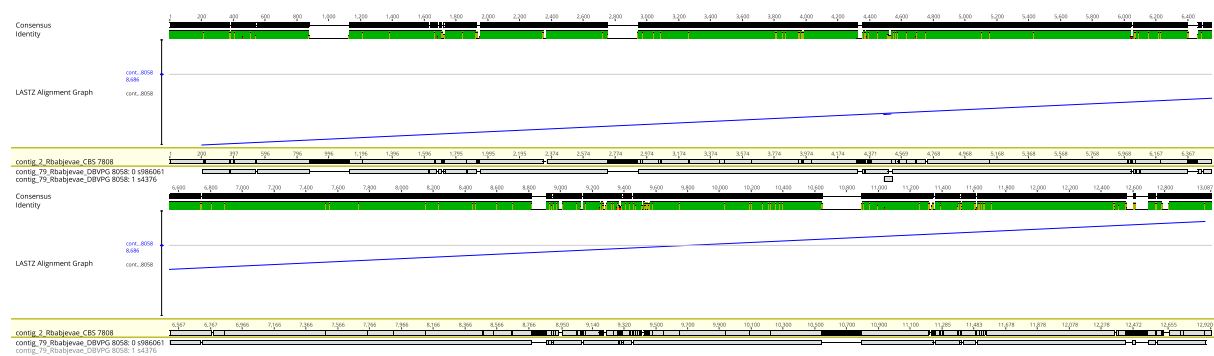

**Supplementary Figure S7.** LASTZ alignment of the mitochondrial genome sequences of *Rhodotorula babjevae* CBS 7808 and DBVPG 8058. The alignment was performed with the sequences after circularization. The consensus sequence is represented as a black bar. The identity bar represents pairs as green for 100% mean pairwise identity, green-brown for at least 30% and under 100%, and red for below 30%. In the bar representation of each sequence, pairs with 100% mean pairwise identity are gray and the gaps are represented either as a horizontal line in the contig that lacks the sequence or as a black bar in the contig that contains the sequence. Within the LASTZ alignment diagram, unique forward alignments are shown in blue and unique backward alignments are shown in red.

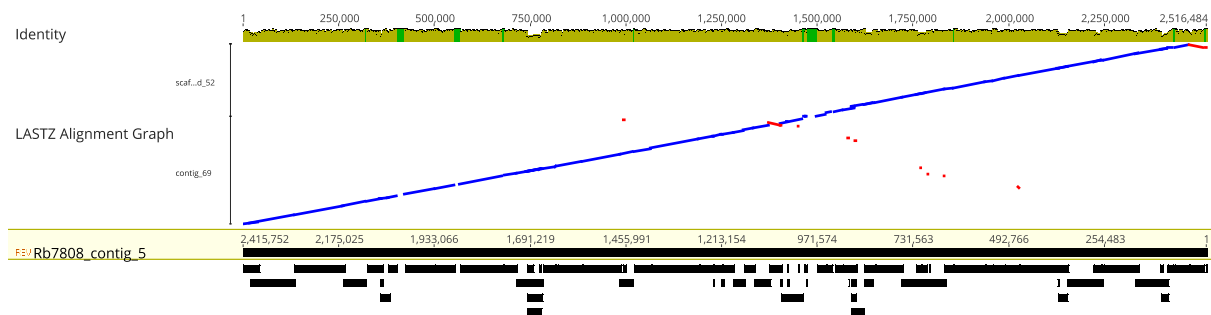

(a)

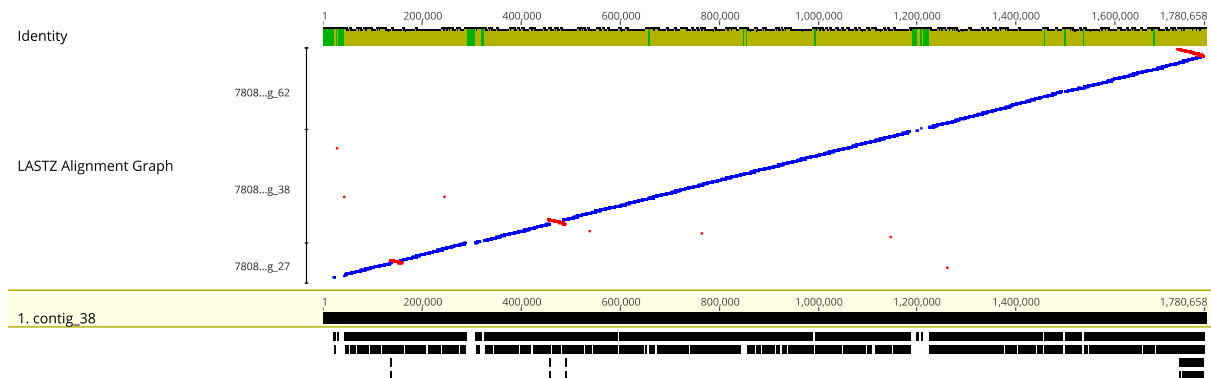

(b)

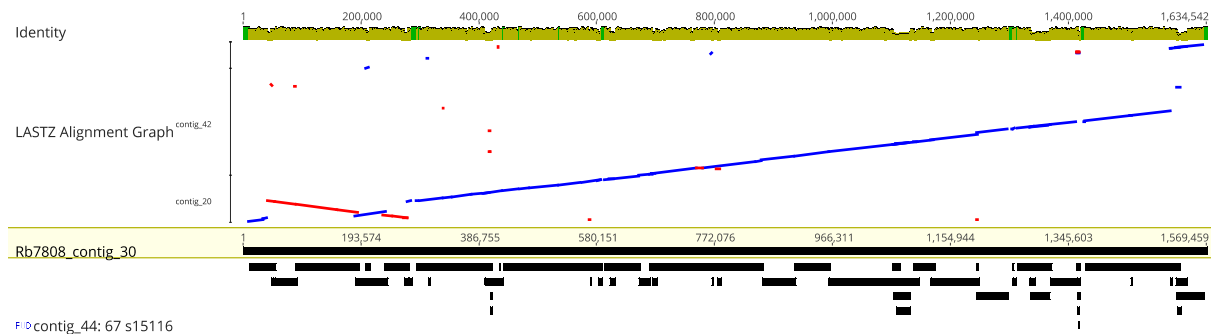

(c)

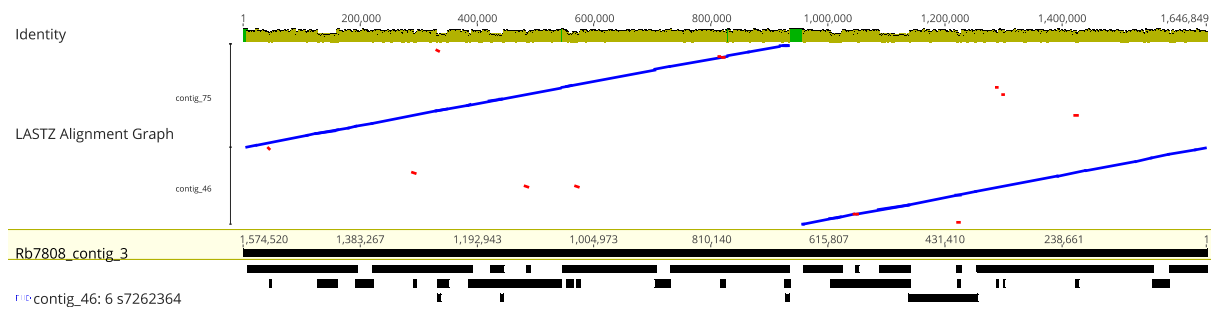

(d)

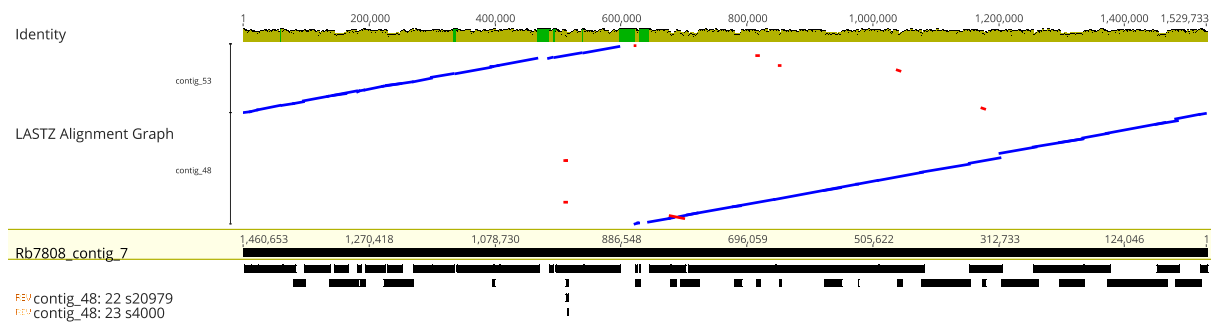

(e)

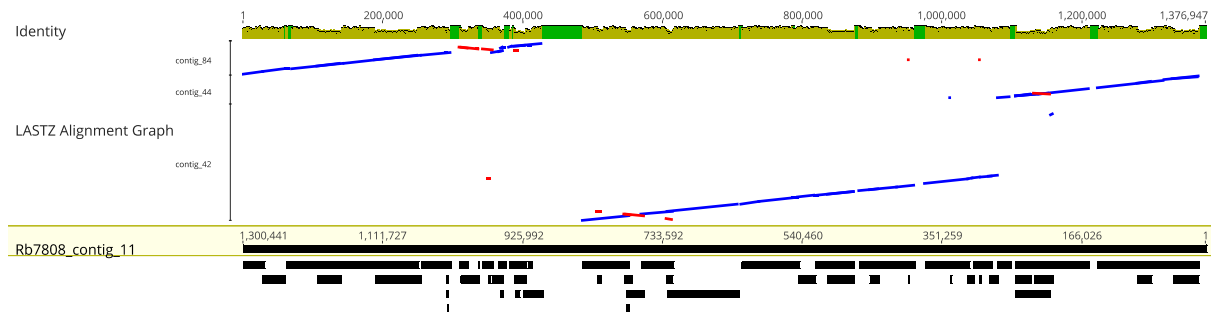

(f)

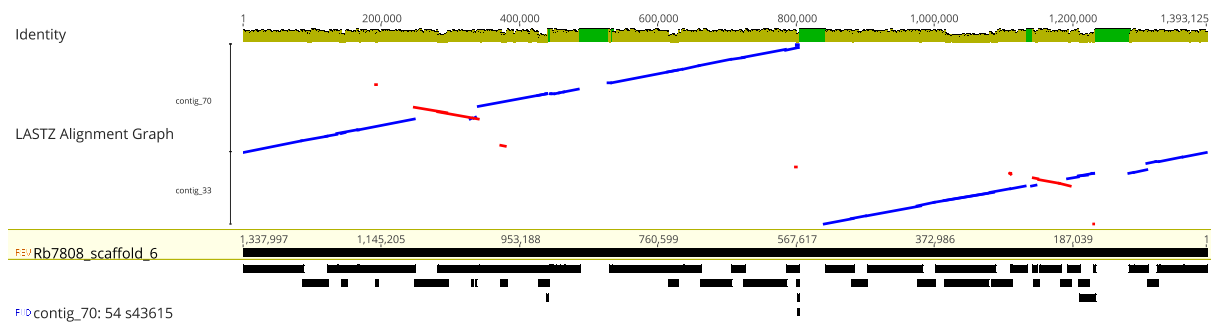

(g)

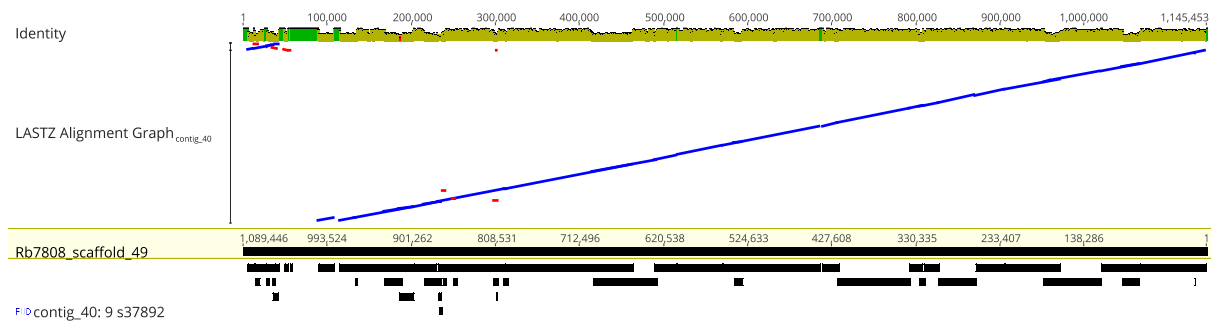

(h)

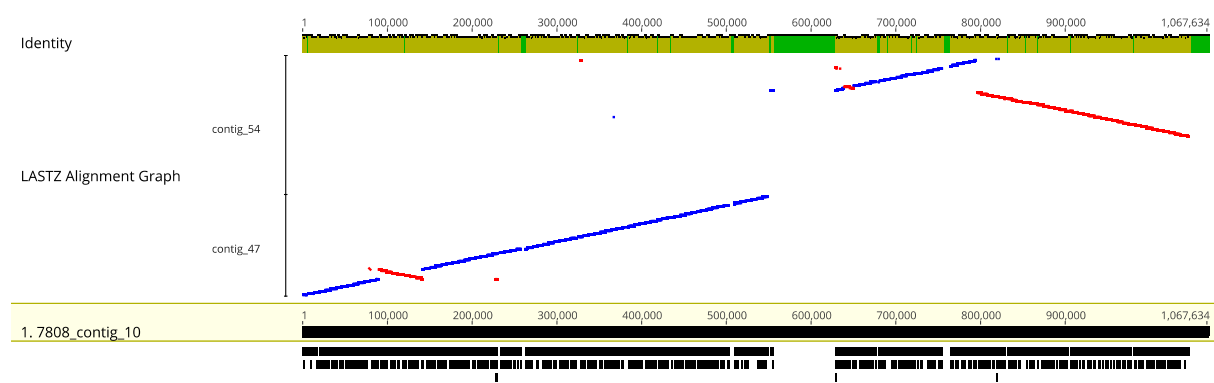

(i)

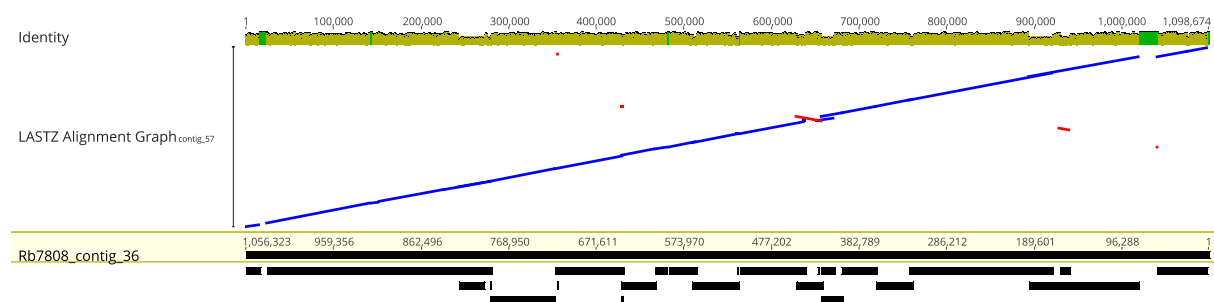

(j)

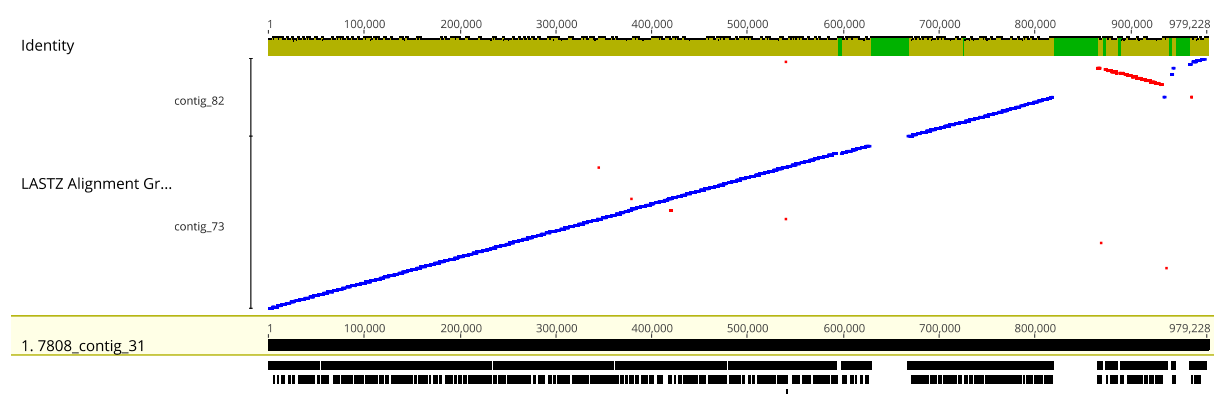

(k)

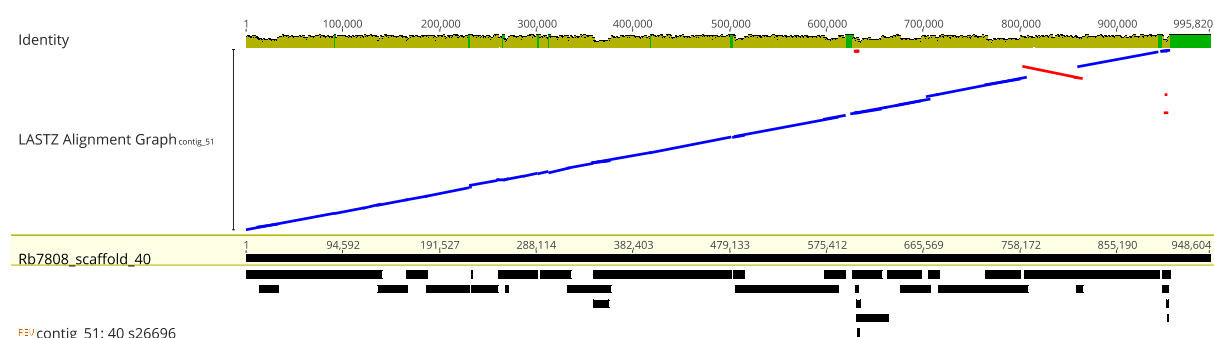

FEV contig\_51: 40 s26696

(l)

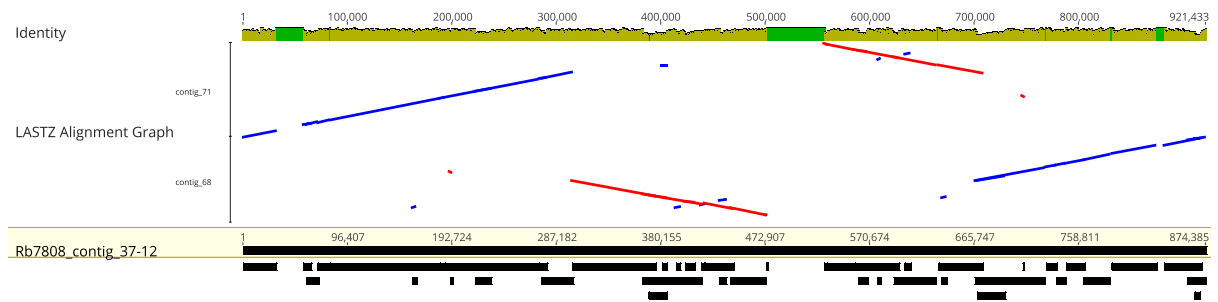

(m)

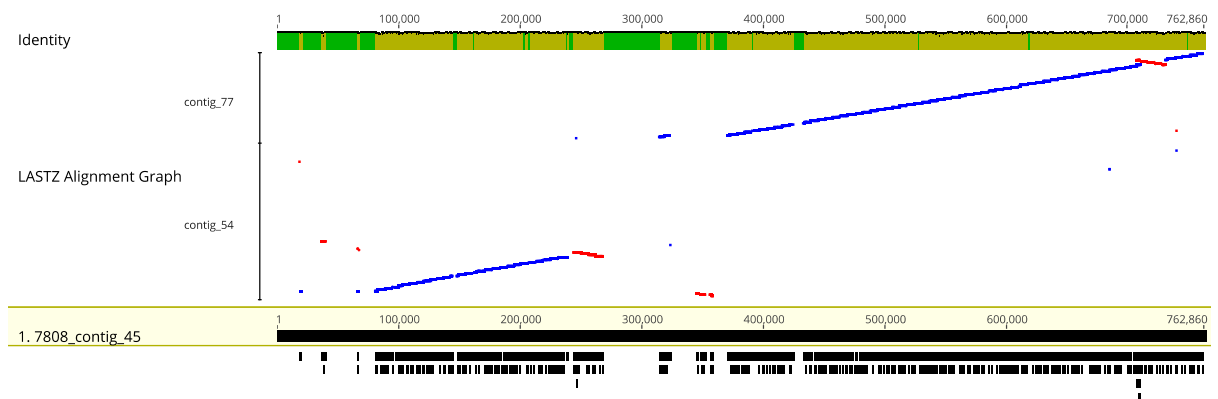

(n)

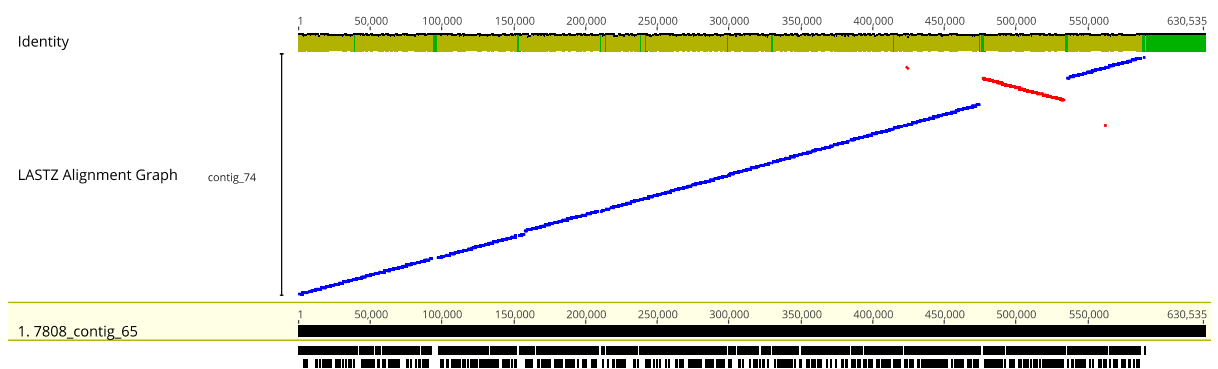

(o)

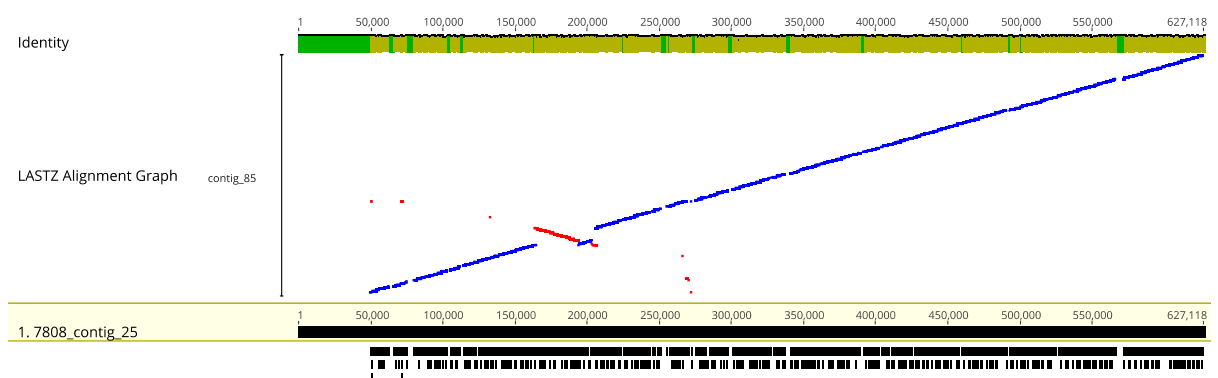

(p)

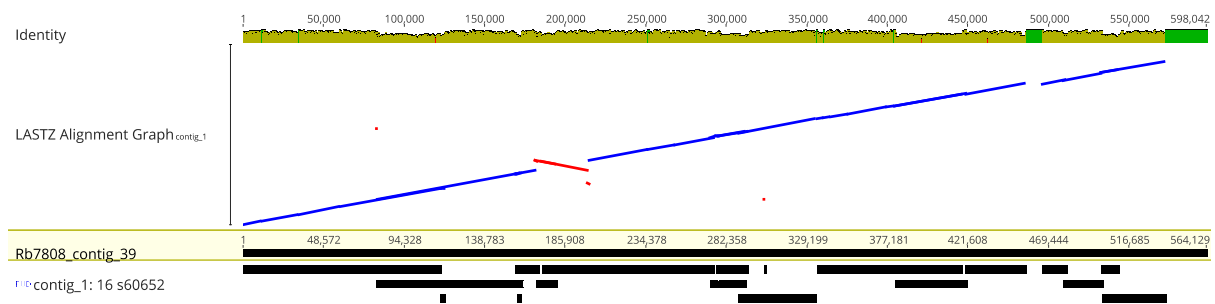

(q)

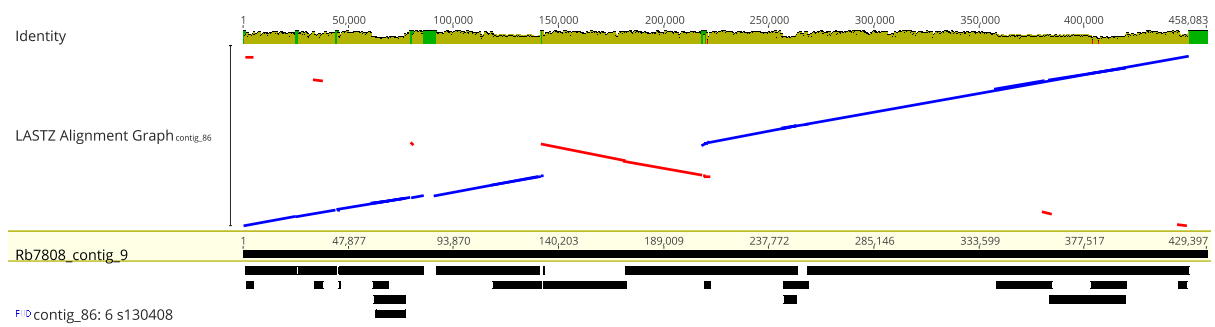

(r)

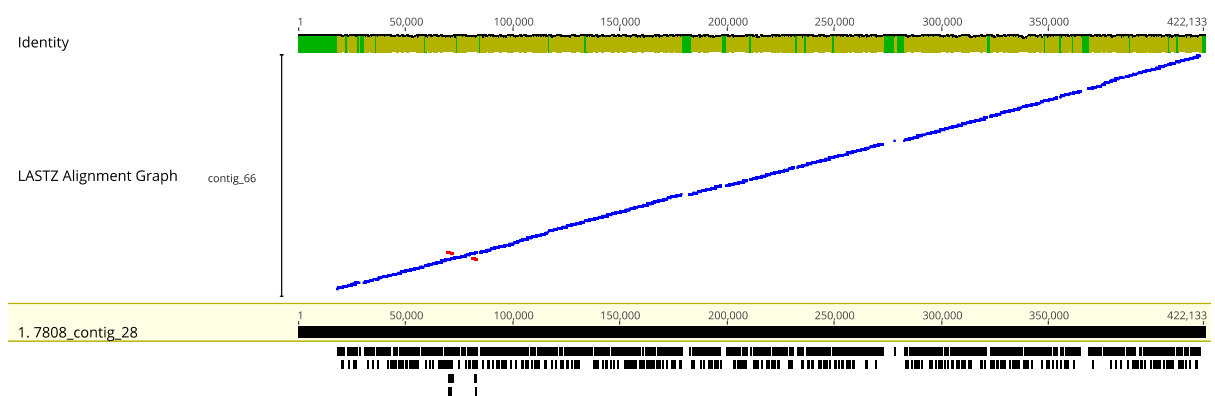

(s)

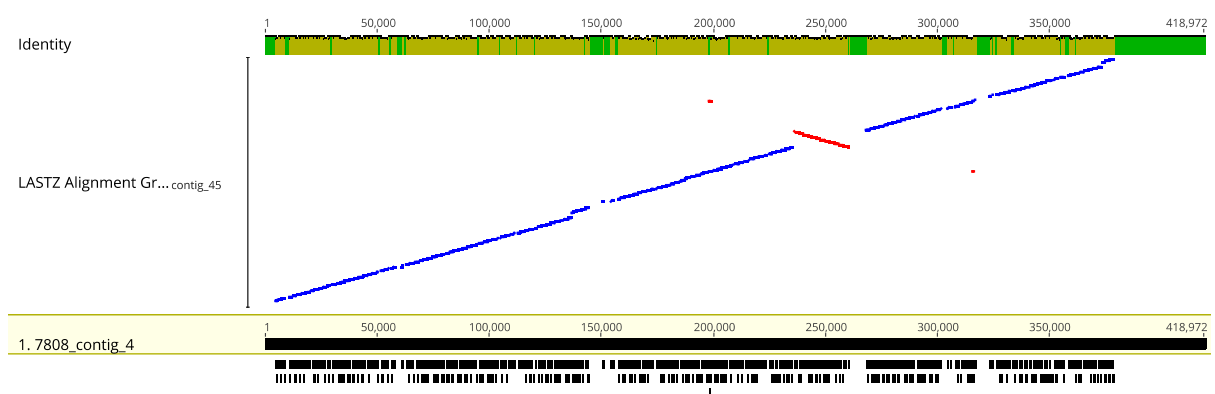

(t)



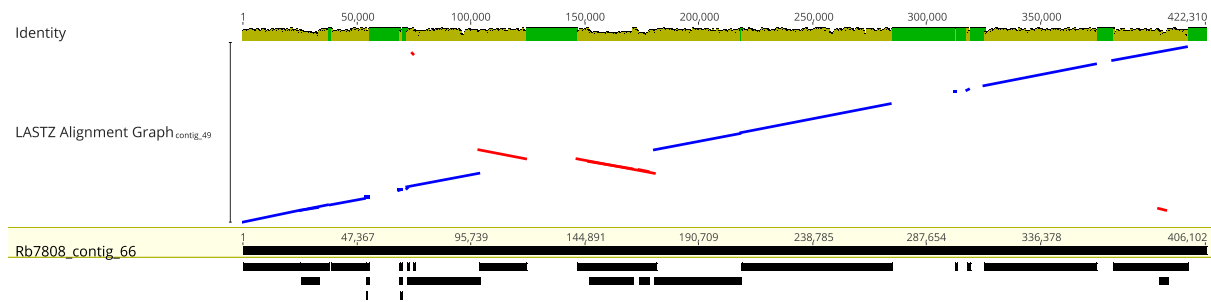

(u)

**Supplementary Figure S8.** LASTZ alignment of contigs with assigned homology of *Rhodotorula babjevae* CBS 7808 and DBVPG 8058 representing putative chromosomes. *R. babjevae* putative chromosomes: (a) 1, (b) 2, (c) 3, (d) 4, (e) 5, (f) 6, (g) 7, (h) 8, (i) 9, (j) 10, (k) 11, (l) 12, (m) 13, (n) 14, (o) 15, (p) 16, (q) 17, (r) 18, (s) 19, (t) 20, (u) 21. The identity bar represents pairs as green for 100% mean pairwise identity, green-brown for at least 30% and under 100%, and red for below 30%. In the bar representation of each sequence, pairs with 100% mean pairwise identity are gray and the gaps are represented either as a horizontal line in the contig that lacks the sequence or as a black bar in the contig that contains the sequence. Within the LASTZ alignment diagram, unique forward alignments are shown in blue and unique backward alignments are shown in red.
